1 **Revealing the secrets beneath grapevine and *Plasmopara viticola* early**  
2 **communication: a picture of host and pathogen proteomes**

3

4 Running title: Grapevine and *P. viticola* proteomes communication

5

6 Joana Figueiredo<sup>1,\*</sup>, Rita B. Santos<sup>1</sup>, Leonor Guerra-Guimarães<sup>2,3</sup>, Céline C. Leclercq<sup>4</sup>, Jenny  
7 Renaut<sup>4</sup>, Lisete Sousa<sup>5</sup>, Andreia Figueiredo<sup>1</sup>

8 1 Grapevine Pathogen Systems Lab, BioISI – Biosystems & Integrative Sciences Institute, Plant  
9 Biology Department, Faculty of Sciences, University of Lisbon, 1749-016 Lisboa, Portugal

10 2 Centro de Investigação das Ferrugens do Cafeeiro, Instituto Superior de Agronomia,  
11 Universidade de Lisboa, 2784-505 Oeiras, Portugal

12 3 Linking Landscape, Environment, Agriculture and Food, Instituto Superior de Agronomia,  
13 Universidade de Lisboa, 1349-017 Lisboa, Portugal

14 4 Luxembourg Institute of Science and Technology, L-4362 Esch-sur-Alzette, Luxembourg

15 5 Departamento de Estatística e Investigação Operacional, Centro de Estatística e Aplicações,  
16 Faculdade de Ciências, Universidade de Lisboa, 1749-016 Lisboa, Portugal

17

18 \* Correspondence: [jffigueiredo@fc.ul.pt](mailto:jffigueiredo@fc.ul.pt)

19

20

21 **Abstract:**

22 Plant apoplast is the first hub of plant-pathogen communication where pathogen effectors are  
23 recognized by plant defensive proteins and cell receptors and several signal transduction  
24 pathways are activated. As a result of this first contact, the host triggers a defence response that  
25 involves the modulation of several extra and intracellular proteins. In grapevine-pathogen  
26 interactions, little is known about the communication between cells and apoplast. Also, the role  
27 of apoplastic proteins in response to pathogens still remains a blackbox. In this study we focused  
28 on the first 6 hours after *Plasmopara viticola* inoculation to evaluate grapevine proteome  
29 modulation in the apoplastic fluid (APF) and whole leaf tissue. *Plasmopara viticola* proteome  
30 was also assessed enabling a deeper understanding of plant and pathogen communication. Our  
31 results showed that oomycete recognition, plant cell wall modifications, ROS signalling and  
32 disruption of oomycete structures are triggered in Regent after *P. viticola* inoculation. Our  
33 results highlight a strict relation between the apoplastic pathways modulated and the proteins  
34 identified in the whole leaf proteome. On the other hand, *P. viticola* proteins related to  
35 growth/morphogenesis and virulence mechanisms were the most predominant. This pioneer  
36 study highlights the early dynamics of extra and intracellular communication in grapevine  
37 defence activation that leads to the successful establishment of an incompatible interaction.

38

39 **Keywords (3-10):** *Vitis vinifera*, apoplastic fluid, cell compartments, secretomes, oomycete,  
40 proteomics

41

42 **1. Introduction**

43 As sessile organisms, plants have developed mechanisms to rapidly adapt to environmental  
44 changes and pathogen attack. To overcome pathogen challenges, plants must quickly recognize  
45 the invaders and mount a successful defence strategy. This chess game between the plant and  
46 pathogen is illustrated by the “zig zag model”, coined by Jones and Dangl in 2006<sup>1</sup>. In this model,  
47 the plants first recognize the pathogen-associated molecular patterns (PAMPs) through pattern  
48 recognition receptors (PRR) in the apoplast, leading to a PAMP-triggered immunity (PTI). The  
49 apoplast is extremely relevant for plant defence since is where plant and pathogen first meet  
50 and where recognition begins. Pathogen recognition culminates in the activation of plant  
51 defence responses including the induction of defence genes, production of reactive oxygen  
52 species (ROS) and deposition of callose. In a second phase, effector-triggered susceptibility or  
53 ETS, the pathogen overcomes the plant first response by deploying effectors that increase  
54 pathogen virulence, like Crinklers and RxLR effectors<sup>1</sup>. In an incompatible interaction, the plant  
55 recognizes the pathogen effectors through R-proteins. The interaction between plant R-proteins  
56 and pathogen effectors results in an effector-triggered immunity (ETI), that ultimately results in  
57 a hypersensitive cell death response (HR) at the pathogen entry site<sup>1</sup>. This interaction implies a  
58 tight communication between host and pathogen with the traffic of plant proteins and pathogen  
59 effector proteins between the apoplast and the intercellular space. While still misgraded, the  
60 study of plant apoplast is of extreme importance in plant-pathogen interactions so to identify  
61 proteins with a key role in plant defence strategies and better understand their interaction with  
62 pathogen molecules. Apoplast proteome was characterized for few plant models, constitutively

63 or under abiotic/biotic stress, as for example, grapevine<sup>2,3</sup>, poplar<sup>4</sup>, tobacco<sup>5</sup>, cowpea<sup>6</sup>, rice<sup>7</sup>,  
64 coffee<sup>8,9</sup> and Arabidopsis<sup>10</sup>. However, few studies focus on uncovering apoplast proteome  
65 modulation considering plant-pathogen interactions and even less when considering woody  
66 crop plants, such as grapevine and obligatory biotrophic oomycetes, as the downy mildew  
67 etiological agent, *Plasmopara viticola*.

68 Grapevine (*Vitis vinifera* L.), is one of the major crops grown in temperate climates, however is  
69 highly susceptible to downy mildew, caused by *P. viticola* ((Berk. and Curt.) Berl. & de Toni)<sup>11</sup>.  
70 In Europe, *P. viticola* infection leads to heavy crop losses and disease management for downy  
71 mildew relies on the massive use of pesticides in susceptible varieties in each growing season.  
72 This practice is against the demands of the European Union guidelines for pesticide reduction  
73 and sustainable viticulture (Directive 2009/128/EC), so the search for more plant- and  
74 environment-friendly solutions is imperative.

75 In a modern viticulture context, the development of grapevine crossing lines, in breeding  
76 programs, is a very well established and accepted strategy to fight against the excessive use of  
77 pesticides. These crossing lines are the result of the introgression of pathogen resistant genes,  
78 present in Asian and American *Vitis* species, with genes related to the good quality of grapes for  
79 wine production, present in susceptible grapevine cultivars. The result is a cultivar that present  
80 desired characteristics for wine producers at the same time that resists more to pathogen attack.  
81 'Regent' is a successful example of breeding for resistance and harbours RPV3.1 resistance to *P.*  
82 *viticola* loci<sup>12</sup>. Several studies have been performed in 'Regent'-*P. viticola* interaction with the  
83 aim to better understand the molecular mechanisms and the key molecules that are responsible  
84 to the well-known tolerance that this crossing line has against *P. viticola*<sup>13-17</sup>.

85 In a climate change scenario, viticulture will face new emerging diseases as well as several  
86 outbreaks of the established diseases, such as downy mildew. Thus, a comprehensive  
87 knowledge on the grapevine strategies to overcome pathogens, mainly in cultivars with some  
88 resistance level, as well as the evolution of pathogen infection mechanisms is paramount to  
89 tackle this challenge. Thus, in the present study, we have focused on the early communication  
90 between grapevine and *P. viticola* and assessed, for the first time, grapevine apoplast proteome  
91 modulation and *P. viticola* proteome and secretomes. We have focused on the first 6 hours post  
92 inoculation (hpi), as the events occurring in this time-point were previously shown to be crucial  
93 for the outcome of the interaction. We have also highlighted extra and intra-cellular  
94 communication pathways by comparing the proteome modulation in the apoplast and in the  
95 whole leaf. Up to our knowledge this is the first time where grapevine apoplast and whole leaf  
96 proteome communication is revealed during host-pathogen interaction and also the first *P.*  
97 *viticola* proteome sequencing. Our results elucidate the interaction between grapevine and *P.*  
98 *viticola* proteins taking place in the apoplast and how the plant and pathogen proteomes evolve  
99 at the first stages of infection.

100

101

## 102 2. Results

### 103 2.1 Early 'Regent' APF proteome modulation under *P. viticola* infection

104 The impact of *P. viticola* infection in the modulation of APF proteome in 'Regent' leaves was  
105 analysed at 6 hours post inoculation (hpi). By a principal components analysis (PCA), a clear  
106 distinction between the proteome of inoculated and mock-inoculated (control) samples was  
107 obtained (Fig.1). The distribution of the biological replicates within the PCA scores plot indicates  
108 the absence of unwanted variation in the dataset, increasing the confidence in the  
109 reproducibility of the differential accumulation analysis.

110

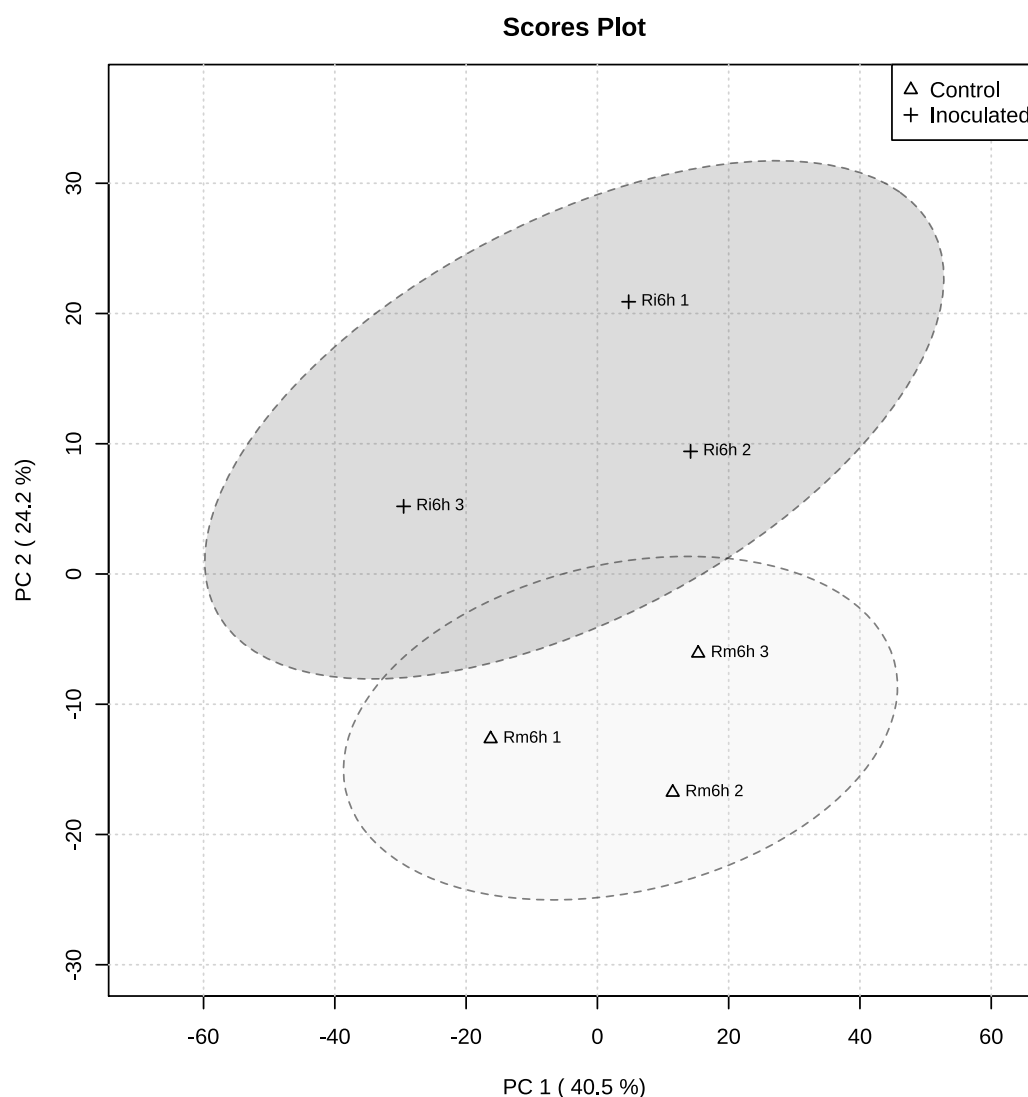

111

112 **Fig.1.** Principal component analysis of the differential protein profiles in *V. vinifera* cv. 'Regent' at 6 hours  
113 post-inoculation with *P. viticola*. The plot shows principal component 1 (PC1) on X axis and principal  
114 component 2 (PC2) on Y axis, together they explain 64.7% of protein abundance variability. Ri: 'Regent'  
115 inoculated samples; Rm: 'Regent' mock-inoculated samples.

116

117 When comparing APF inoculated samples with mock-inoculated samples, a hundred and  
118 eighteen proteins were differentially accumulated (DAPs; 74 up accumulated and 44 down  
119 accumulated). These proteins are mainly related to stress response, signal transduction, cell wall  
120 metabolism, transport and protein metabolism (Fig.2). At 6hpi, *P. viticola* infection leads to an  
121 increase in the presence of plant stress response proteins, like glucan endo-1,3- $\beta$ -glucosidases,  
122 disease resistance proteins RPV1-like and RUN1-like [associated to Resistance to *P. viticola* (RPV)  
123 loci and Resistance to *Uncinula necator* (RUN) loci], receptor-like protein kinase FERONIA and  
124 GDSL esterases/lipases. An up accumulation of LRR kinases related to signal transduction occurs.  
125 ROS-related proteins, like peroxidase 4-like and xanthine dehydrogenase 1-like isoform X1, were  
126 also detected in 'Regent' APF after oomycete challenged.

127

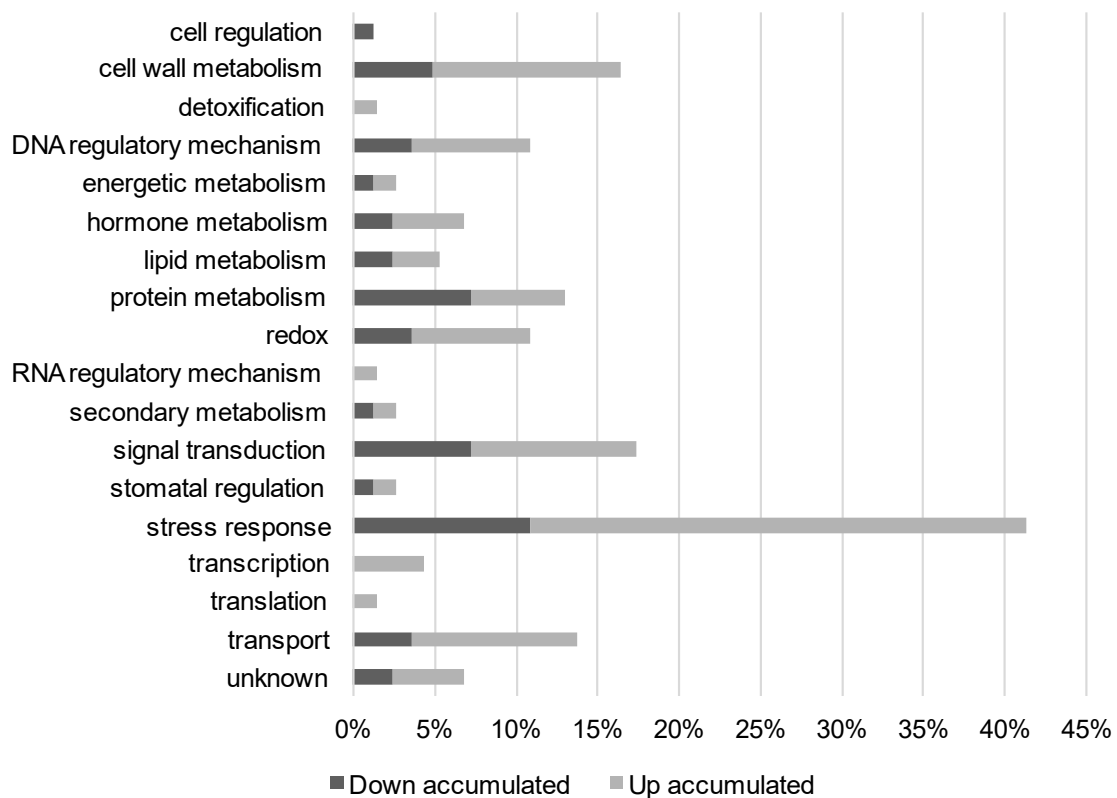

128

129 **Fig.2.** Biological process annotation of the differentially accumulated 'Regent' APF proteins, 6 hours post  
130 inoculation with *P. viticola*. Dark grey bars: percentage of down accumulated proteins; Light grey bars:  
131 percentage of up accumulated proteins.

132

133 Several proteins involved in 'Regent' defence mechanism were modulated at 6hpi (Table 1).  
134 Indeed, apoplastic proteins related to oomycete perception, that may lead to the activation of  
135 several defence signalling pathways, were found to be accumulated (Table 1). Apoplastic  
136 proteins associated with the remodelling of plant cell wall were also identified as well as proteins  
137 associated with auxin signalling and its regulation in response to *P. viticola* infection (Table 1).  
138 Moreover, several proteins associated to ROS production and signalling were modulated at this  
139 early time-point of infection (Table 1). Lastly, plant proteins involved in the disruption of  
140 oomycete structures were also identified (Table 1).

141

142 **Table 1.** ‘Regent’ APF proteins up accumulated at 6hpi with *P. viticola*, involved in key cellular pathways.

| NCBI accession                                                               | NCBI description                                                                         | Biological process     | log <sub>2</sub> (FC) |
|------------------------------------------------------------------------------|------------------------------------------------------------------------------------------|------------------------|-----------------------|
| <b>Modulation of plant physical barriers</b>                                 |                                                                                          |                        |                       |
| XP_002281842.1                                                               | ABC transporter G family member 32 (ABCG32)                                              | stress response        | 19,00                 |
| XP_002263127.1                                                               | fatty acyl-CoA reductase 3-like (FAR3)                                                   | lipid metabolism       | 18,83                 |
| NP_001268091.1                                                               | pectinesterase/pectinesterase inhibitor PPE8B-like (PPE8B)                               | cell wall modification | 15,93                 |
| XP_002277293.4                                                               | pectinesterase                                                                           | cell wall metabolism   | -1,80                 |
| <b>Modulation of plant plasma membrane proteins in response to infection</b> |                                                                                          |                        |                       |
| XP_019071787.1                                                               | disease resistance protein RPV1-like isoform X1 (RPV1)                                   | stress response        | 19,12                 |
| XP_019073586.1                                                               | disease resistance protein RUN1-like isoform X1 (RUN1)                                   | stress response        | 17,99                 |
| XP_010644327.1                                                               | disease resistance protein At4g27190-like                                                | stress response        | 4,69                  |
| XP_002280315.3                                                               | probable disease resistance protein At1g61300                                            | stress response        | 18,99                 |
| XP_019077695.1                                                               | probable disease resistance protein At1g61300                                            | stress response        | 4,47                  |
| XP_010654733.1                                                               | probable disease resistance protein At5g63020                                            | stress response        | 21,94                 |
| XP_010645387.1                                                               | TMV resistance protein N                                                                 | stress response        | 21,70                 |
| XP_019078946.1                                                               | TMV resistance protein N                                                                 | stress response        | 17,22                 |
| XP_019075299.1                                                               | leucine-rich repeat receptor protein kinase MSP1-like                                    | signal transduction    | 16,43                 |
| XP_002267269.1                                                               | probable leucine-rich repeat receptor-like protein kinase At1g35710                      | signal transduction    | 16,39                 |
| XP_002282474.2                                                               | serine-threonine protein kinase, plant-type, putative                                    | signal transduction    | 18,49                 |
| XP_010660578.1                                                               | receptor-like protein kinase FERONIA (FERONIA)                                           | stress response        | 18,38                 |
| XP_010664467.1                                                               | ATPase 9, plasma membrane-type                                                           | transport              | 19,39                 |
| XP_002279498.1                                                               | putative calcium-transporting ATPase 13, plasma membrane-type (Ca <sup>2+</sup> -ATPase) | transport              | 15,64                 |
| XP_002283826.1                                                               | protein unc-13 homolog                                                                   | stomatal regulation    | 18,55                 |
| XP_010647591.2                                                               | ankyrin repeat-containing protein ITN1-like isoform X6 (ITN1)                            | stress response        | 16,63                 |
| <b>Activation of auxin signalling</b>                                        |                                                                                          |                        |                       |
| XP_002274153.1                                                               | protein kinase PINOID                                                                    | hormone signalling     | 22,45                 |
| XP_002277611.1                                                               | protein NDL2                                                                             | hormone signalling     | 16,72                 |
| XP_002265864.1                                                               | ubiquitin-NEDD8-like protein RUB2                                                        | protein metabolism     | 16,62                 |
| <b>Regulation of ROS during plant defence response</b>                       |                                                                                          |                        |                       |
| XP_002269918.1                                                               | peroxidase 4-like                                                                        | redox                  | 21,05                 |
| XP_002274392.1                                                               | purple acid phosphatase (PAP)                                                            | energetic metabolism   | 20,55                 |
| XP_002285473.1                                                               | xanthine dehydrogenase 1-like isoform X1 (XDH1)                                          | redox                  | 16,51                 |
| <b>Disruption of oomycete structures</b>                                     |                                                                                          |                        |                       |
| XP_010664681.1                                                               | glucan endo-1,3-beta-D-glucosidase                                                       | stress response        | 19,85                 |
| XP_002283647.1                                                               | glucan endo-1,3-beta-glucosidase                                                         | stress response        | 15,09                 |
| XP_002268991.2                                                               | GDSL esterase/lipase (GELP)                                                              | stress response        | 15,72                 |
| XP_002276525.1                                                               | GDSL esterase/lipase At4g01130 (GELP)                                                    | stress response        | 6,00                  |

143

144

## 145 2.2 'Regent' whole leaf proteome modulation at 6h post *P. viticola* infection

146 Whole leaf proteome of 'Regent' during *P. viticola* infection time-course was obtained in 2020  
147 <sup>13</sup>. Raw data deposited on the Pride database of the 6hpi was re-analysed following the same  
148 pipeline that was implemented for the APF proteome analysis. Hundred and fifty-two DAPs were  
149 identified. Of those, 69 proteins were up accumulated and 83 were down accumulated. These  
150 proteins were mainly related to stress response, energy and secondary metabolisms and  
151 translation (Fig.3). At 6hpi, *P. viticola* infection induces a modulation in the abundance of several  
152 stress-related proteins, like heat shock proteins, cysteine proteinases and glucanases. In  
153 addition, a great number of photosynthesis-related proteins are down accumulated in 'Regent'  
154 leaves in response to infection. Translation and signal transduction-related proteins, like  
155 ribosomal proteins and serine/threonine protein kinase (RSTK), respectively, were up  
156 accumulated after *P. viticola* infection.

157

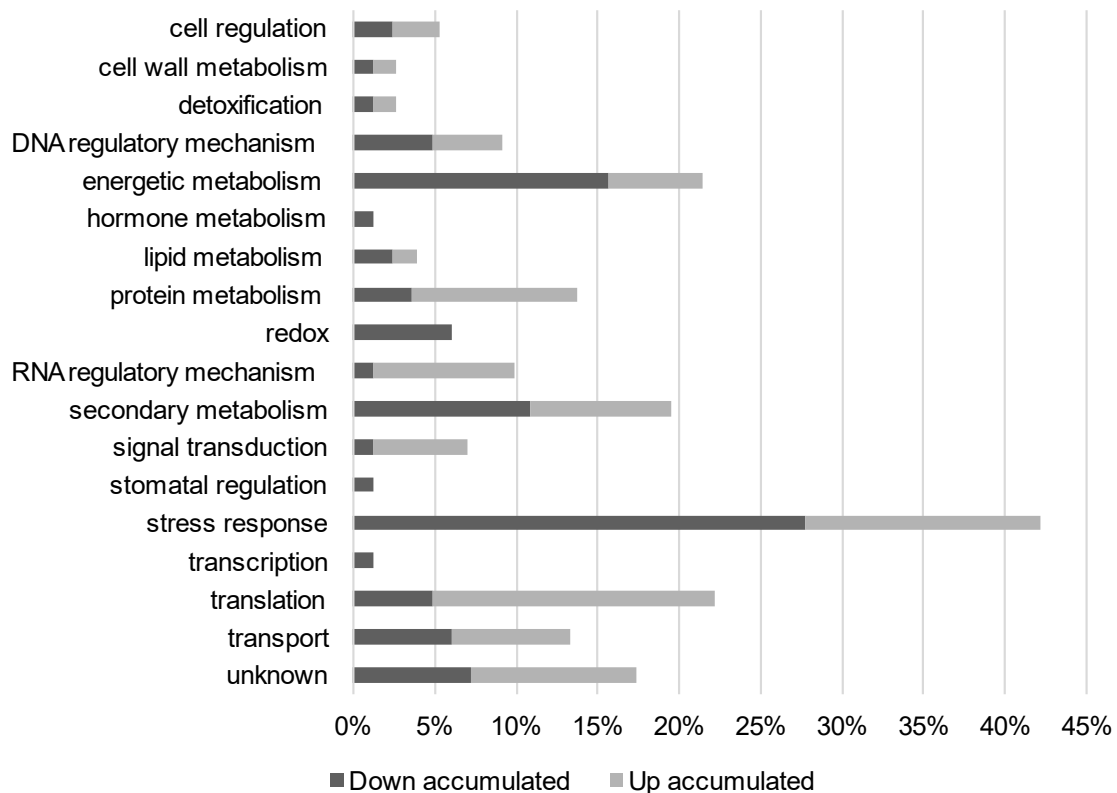

158

159 **Fig.3.** Biological process annotation of the differentially accumulated 'Regent' whole leaf proteins, 6 hours  
160 post inoculation with *P. viticola*. Dark grey bars: percentage of down accumulated proteins; Light grey  
161 bars: percentage of up accumulated proteins.

162

163 The functional annotation of several of the proteins identified in whole leaf are closely related  
164 with the pathways that were found to be modulated in APF proteins (Table 2). Indeed, we have  
165 identified whole leaf proteins involved in the modulation of plant physical barriers and activation  
166 of plant defence signalling through plasma membrane receptors, regulation of ROS levels, and

167 disruption of oomycete structures (Table 2). Also, proteins associated with calcium signalling,  
 168 and intracellular trafficking vesicles were modulated in the whole leaf context (Table 2).

169

170 **Table 2.** Regent' whole proteins up accumulated at 6hpi with *P. viticola*, involved in key cellular pathways.

| NCBI accession                                                                                      | NCBI description                                                  | Biological process   | log <sub>2</sub> (FC) |
|-----------------------------------------------------------------------------------------------------|-------------------------------------------------------------------|----------------------|-----------------------|
| <b>Modulation of plant physical barriers and plasma membrane receptors in response to infection</b> |                                                                   |                      |                       |
| CAN83165.1                                                                                          | pectinesterase inhibitor 9 (PMEI9)                                | cell wall metabolism | 2,39                  |
| CBI32865.3                                                                                          | alpha-L-arabinofuranosidase 1 (ASD1)                              | cell wall metabolism | -18,97                |
| XP_002267434.3                                                                                      | serine/threonine protein kinase (RSTK)                            | signal transduction  | 6,90                  |
| XP_002265462.3                                                                                      | serine/threonine-protein kinase pakA (RSTK)                       | signal transduction  | 17,31                 |
| <b>Regulation of ROS during plant defence response</b>                                              |                                                                   |                      |                       |
| CBI31928.3                                                                                          | peroxisome biogenesis protein 19-2-like (PEX19-2)                 | protein metabolism   | 19,28                 |
| CBI32544.3                                                                                          | protein TIC 62, chloroplastic isoform X1                          | transport            | 18,74                 |
| CAN66554.1                                                                                          | succinate dehydrogenase assembly factor 4, mitochondrial (SDHAF4) | energetic metabolism | 17,63                 |
| XP_002283860.1                                                                                      | 15.7 kDa heat shock protein, peroxisomal                          | stress response      | 20,89                 |
| CAN67665.1                                                                                          | 17.3 kDa class II heat shock protein-like                         | stress response      | 6,61                  |
| XP_003634522.1                                                                                      | peroxidase 12                                                     | redox                | -21,36                |
| XP_002285652.2                                                                                      | peroxidase A2-like                                                | redox                | -8,08                 |
| XP_010647098.1                                                                                      | polyphenol oxidase, chloroplastic-like                            | redox                | -20,80                |
| CBM39273.1                                                                                          | 18.2 kDa class I heat shock protein                               | stress response      | -20,66                |
| CBI30632.3                                                                                          | 28 kDa heat- and acid-stable phosphoprotein                       | stress response      | -19,75                |
| CBM39216.1                                                                                          | class I heat shock protein                                        | stress response      | -21,56                |
| CBI23075.3                                                                                          | small heat shock protein, chloroplastic                           | stress response      | -21,87                |
| <b>Disruption of oomycete structures</b>                                                            |                                                                   |                      |                       |
| CBI32343.3                                                                                          | endo-1,3;1,4-beta-D-glucanase-like                                | stress response      | -21,33                |
| CBI26171.3                                                                                          | endo-1,3;1,4-beta-D-glucanase-like isoform X3                     | stress response      | -19,29                |
| CAN71820.1                                                                                          | glucan endo-1,3-beta-glucosidase                                  | stress response      | -20,49                |
| CBI36040.3                                                                                          | profilin 1                                                        | cell regulation      | 20,96                 |
| <b>Modulation of calcium signalling</b>                                                             |                                                                   |                      |                       |
| CBI15387.3                                                                                          | calcium sensing receptor, chloroplastic                           | stomatal regulation  | -19,74                |
| CBI24493.3                                                                                          | CDGSH iron-sulfur domain-containing protein NEET                  | secondary metabolism | -7,88                 |
| <b>Increase of protein trafficking</b>                                                              |                                                                   |                      |                       |
| CBI28256.3                                                                                          | putative clathrin assembly protein At5g35200                      | stress response      | 21,36                 |

171

### 172 **2.3 *P. viticola* proteome during infection establishment**

173 We have sequenced for the first time the *P. viticola* proteome, obtained from grapevine leaves  
 174 apoplast at 6hpi. Sixty proteins were identified being mainly involved in two biological  
 175 processes: growth/morphogenesis (e.g. cell division cycle 5 and  $\beta$ -glucan synthesis-associated  
 176 SKN1) and virulence (RxLR proteins and serine protease trypsin's). Proteins involved in signalling  
 177 processes like agc kinase (ACG), serine threonine kinase and small GTP-binding Rab28 were also  
 178 identified (Table 3).

179

180



181 **Table 3.** *P. viticola* proteins, identified in ‘Regent’ apoplast after 6hpi, involved in virulence and  
182 growth/morphogenesis mechanisms.

| Protein name                                                | Protein code (INRA Database) |
|-------------------------------------------------------------|------------------------------|
| <b>Proteins involved in virulence mechanisms</b>            |                              |
| Coproporphyrinogen III oxidase (CPOX)                       | PVIT_0003600.T1              |
| RxLR-like protein (RxLR)                                    | PVIT_0014146.T1              |
| RxLR-like protein (RxLR)                                    | PVIT_0014142.T1              |
| Serine protease trypsin                                     | PVIT_0011817.T1              |
| Serine protease trypsin                                     | PVIT_0011837.T1              |
| Serine threonine kinase                                     | PVIT_0018302.T1              |
| Tetratricopeptide repeat 26                                 | PVIT_0013696.T1              |
| TKL kinase (TKL)                                            | PVIT_0016228.T1              |
| <b>Proteins involved in growth/morphogenesis mechanisms</b> |                              |
| Beta-glucan synthesis-associated SKN1 (SKN1)                | PVIT_0022780.T1              |
| CAMKK kinase (CaMK)                                         | PVIT_0013015.T1              |
| Cell division cycle 5 (CDC5)                                | PVIT_0005546.T1              |
| CMGC CDK kinase (CDK)                                       | PVIT_0011642.T1              |
| CMGC MAPK kinase (MAPK)                                     | PVIT_0009065.T1              |
| FAD synthase-like                                           | PVIT_0001050.T1              |
| Serine threonine kinase                                     | PVIT_0018302.T1              |
| <b>Proteins involved in both mechanisms</b>                 |                              |
| AGC kinase (ACG)                                            | PVIT_0009891.T1              |
| Calpain-like protease                                       | PVIT_0019872.T1              |
| Small GTP-binding Rab28                                     | PVIT_0005551.T1              |

183

### 184 **3. Discussion**

#### 185 **3.1 *P. viticola* leads to a broad modulation of ‘Regent’ APF and whole leaf proteomes**

186 During grapevine-*P. viticola* interaction, the apoplast compartment is the first hub where plant  
187 and pathogen secretomes meet. Several proteins are crucial for the outcome of the interaction,  
188 both from the host or pathogen sides. In the apoplast, processes involving pathogen recognition  
189 through membrane receptors that activate signal transduction pathways for expression of host  
190 defence-associated genes or proteins that directly communicate with pathogen molecules  
191 inhibiting infection progress are essential. Considering the whole leaf tissue, trafficking of  
192 several proteins to respond to the plant defence requirements must be activated as well as  
193 processes that lead to a broad activation of defence-related mechanisms. Thus, communication  
194 between the apoplast and the host intracellular organelles is essential for a concerted and quick  
195 defence response against the pathogen. Moreover, during the interaction, *P. viticola* develops  
196 its infection structures, namely hyphae culminating in plant cell invasion and development of  
197 haustorium for feeding. In the first hours of interaction, host and pathogen communications are  
198 expected to be very dynamic and to define the outcome of the interaction.

199

200 **3.1.1 The dual battle at the gate: host strengthens its physical barriers while the pathogen**  
201 **triggers plant cell wall degradation**

202 The cuticle is a barrier coating the outer surface of epidermal cells of organs of the aerial parts  
203 of the plants. It protects against water loss and various abiotic and biotic stresses<sup>18</sup>. In 'Regent'  
204 APF, two cuticle-related proteins were found to be up accumulated after *P. viticola* infection,  
205 the ABC transporter G family member 32 (ABCG32) and the fatty acyl-CoA reductase 3-like  
206 protein (FAR3), (Table 1; Fig.4). These ABC transporters have been frequently shown to be  
207 involved in pathogen response, surface lipid deposition and transport of the phytohormones  
208 auxin and abscisic acid<sup>19,20</sup>. In Arabidopsis, the ABCG32 was reported to be involved in cuticle  
209 formation, most likely by exporting cutin precursors from the epidermal cell<sup>21</sup>. The fatty acyl-  
210 CoA reductase 3-like protein is involved in cuticular wax biosynthesis<sup>22</sup>. In incompatible  
211 grapevine-*P. viticola* interaction, such as the one that occurs in 'Regent', a higher abundance of  
212 these proteins leads to the hypothesis that the host activates processes to promote the  
213 strengthening the cuticular barrier in order restrain pathogen penetration (Fig.4).

214 Also, plants have developed a system for sensing pathogens and monitoring the cell wall  
215 integrity, upon which they activate defence responses that lead to a dynamic cell wall  
216 remodelling required to prevent pathogen progression. Plant cell wall-associated proteins were  
217 found to be differentially modulated in 'Regent' APF in response to *P. viticola*. A down  
218 accumulation of a pectinesterase, a protein involved in plant cell wall degradation as well as an  
219 up accumulation of pectinesterase/pectinesterase inhibitor PPE8B-like protein (PPE8B), (Table  
220 1; Fig.4). This protein is involved in plant cell wall reconstruction and, in cotton, genes encoding  
221 this type of protein are specifically up regulated in plant resistant variety upon *Aspergillus*  
222 *tubingensis* infection<sup>23</sup>.

223 In the whole leaf proteome of 'Regent', the abundance of pectinesterase inhibitor 9 (PMEI9)  
224 increased, a protein involved in resistance to pathogens<sup>24</sup>, and a decrease in the accumulation  
225 of alpha-L-arabinofuranosidase 1, a protein involved in cell wall degradation<sup>25</sup>, was detected  
226 (Table 2; Fig.4). The whole leaf and apoplast proteomes are modulated as a defence strategy to  
227 prevent cell wall degradation, maintaining its integrity and thus inhibiting the entry of the  
228 oomycete. On the other hand, proteins involved in plant cell wall degradation were found in *P.*  
229 *viticola* proteome (Table 3; Fig.4), namely: coproporphyrinogen III oxidase, which is a peroxidase  
230 with the ability to degrade lignin, one of the components of plant cell walls<sup>26</sup>; trypsins, a serine  
231 proteases family, also identified in the secretomes of several fungus<sup>27</sup>, and linked to  
232 pathogenicity against plant hosts<sup>28</sup>. In *P. viticola*, the two identified trypsins were predicted to  
233 be apoplastic effectors and so it is expected a direct interaction with plant molecules for cell wall  
234 degradation.

235 During plant-pathogen interactions, plant cell wall is a dynamic structure that functions as a  
236 barrier that pathogens need to breach to colonize the plant tissue. Biotrophic pathogens, like *P.*  
237 *viticola*, require a localized and controlled degradation of the cell wall to keep the host cells alive  
238 during feeding. The regulation of the abundance of these cell wall-related proteins in the  
239 apoplast and whole leaf of 'Regent' suggests an adaptation of the grapevine proteome to  
240 prevent cell wall disruption while *P. viticola* secretes proteins that degrade de cell wall to invade  
241 the plant cell.

242

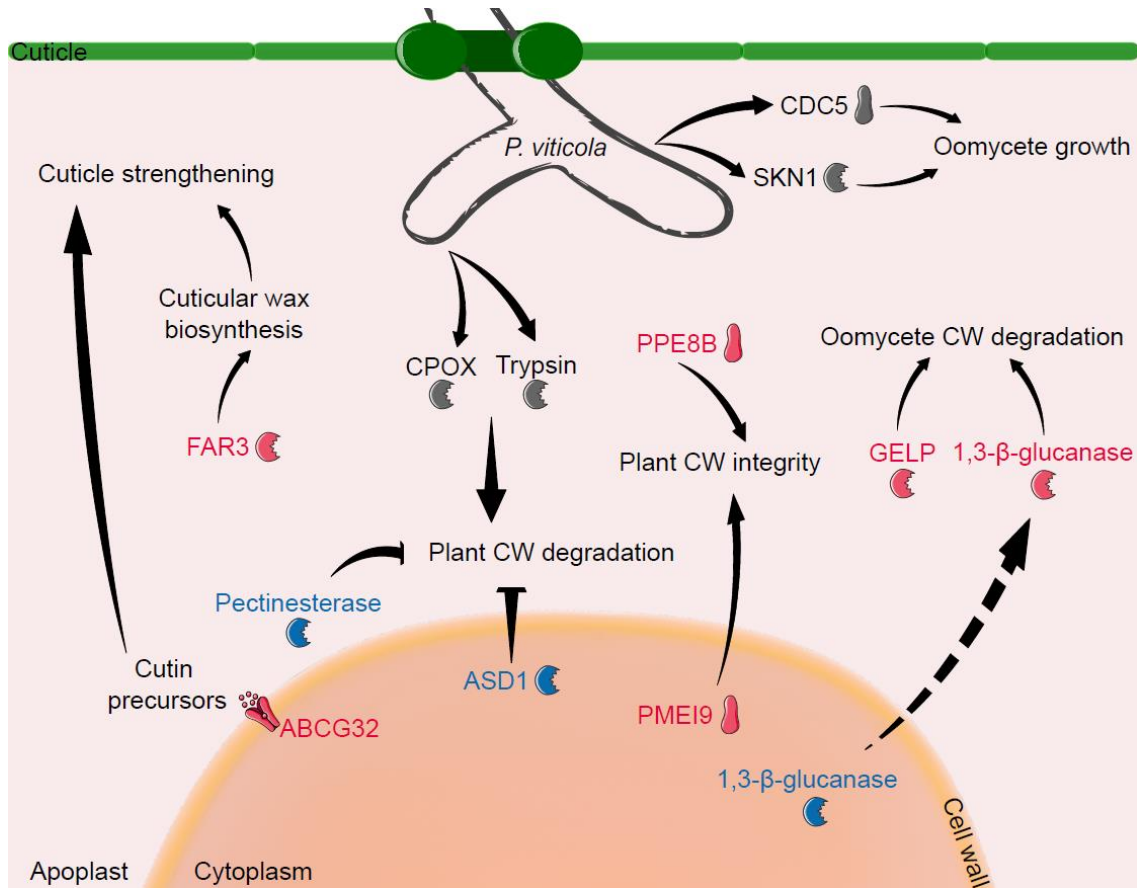

243

244 **Fig.4.** Triggering of host cell wall degradation by *P. viticola* through CPOX and trypsin proteins secretion  
 245 while in the host several proteins associated to the strengthening of the physical barriers (cuticle – eg  
 246 ABCG32, FAR3; cell wall - eg PME19, PPE8B) are positively modulated. At the host also a negative  
 247 modulation of proteins involved in cell wall degradation is promoted, moreover, proteins as 1,3-β-  
 248 glucanases are translocated to the APF for pathogen cell wall degradation. Proteins represented in red  
 249 are positively modulated, proteins represented in blue are negatively modulated (compared to mock-  
 250 inoculated control). Pathogen proteins are represented in grey. 1,3-β-glucanase – includes endo-1,3;1,4-  
 251 beta-D-glucanase-like, endo-1,3;1,4-beta-D-glucanase-like isoform X3 and glucan endo-1,3-beta-  
 252 glucosidase; ABCG32 - ABC transporter G family member 32; ASD1 - alpha-L-arabinofuranosidase 1; CDC5  
 253 - cell division cycle 5; CPOX - coproporphyrinogen III oxidase; CW - cell wall; GELP - GDSL esterase/lipase;  
 254 FAR3 - fatty acyl-CoA reductase 3-like protein; PME19 - pectinesterase inhibitor 9; PPE8B -  
 255 pectinesterase/pectinesterase inhibitor PPE8B-like; SKN1 - beta-glucan synthesis-associated SKN1.

256

### 257 3.1.2 *P. viticola* recognition and signalling events are established as soon as 6hpi

258 The first layer of plant defence relies on the recognition of conserved microbe-associated  
 259 molecular patterns (MAMPs) by the so-called pattern recognition receptors (PRRs). PRRs are  
 260 generally plasma membrane receptors which are often coupled to intracellular kinase domains  
 261 <sup>29</sup>. The second layer of plant immunity depends on the ability of the plant to recognize the  
 262 pathogen effectors, like RxLRs, by disease resistance proteins (R) and trigger a robust resistance  
 263 response <sup>30</sup>. Several states such as oxidative burst, cell wall strengthening, induction of defence  
 264 gene expression, and rapid cell death at the site of infection (hypersensitive response) occur in  
 265 downstream cellular events leading to the establishment of an incompatible interaction <sup>31</sup>.

266 These local hypersensitive responses can trigger long-lasting systemic responses (systemic  
267 acquired resistance (SAR)) that prime the plant for resistance against a broad spectrum of  
268 pathogens<sup>32,33</sup>.

269 We have identified several virulence-related proteins that are secreted by *P. viticola* or that are  
270 present in oomycete infection structures (Table 3; Fig.5). RxLR effectors were detected in *P.*  
271 *viticola* proteome as soon as 6hpi and were predicted to be secreted to the apoplast. These  
272 proteins are key players in virulence for downy mildew species<sup>34</sup> since they are known to defeat  
273 plant immune responses through many routes, which include reprogramming host gene  
274 expression, altering RNA metabolism, and binding to host proteins involved in signalling<sup>35</sup>. On  
275 the host side, eight R-proteins were up-accumulated in the APF after *P. viticola* infection (Table  
276 1; Fig.5), including RPV1-like isoform X1 and RUN1-like isoform X1, which confer resistance to  
277 multiple downy and powdery mildews, respectively, by promoting cell death<sup>36–38</sup>. Also, an up  
278 accumulation of several RSTK was observed both in APF (Table 1) and in whole leaf proteome  
279 (Table 2). These receptors are involved in a wide array of processes ranging from developmental  
280 regulation to disease resistance, including activation of signal transduction for plant defence  
281 response initiation<sup>39,40</sup>. One of the identified receptors in APF is the FERONIA (Fig.5). FERONIA  
282 is a plant recognition receptor kinase which plays a significant role in plant immune system. In  
283 *Catharanthus roseus*, FERONIA acts as a sensor of cell wall integrity challenged by the host-  
284 pathogen interaction and further triggers downstream immune responses in the host cell. In  
285 response to changes in the cell wall, FERONIA induces the release of ROS (reviewed in<sup>41</sup>).  
286 Furthermore, in spinach response to infection with the oomycete *Peronospora effusa*, an up-  
287 regulation of the genes encoding for the FERONIA and a LRR receptor-like RSTK was observed<sup>42</sup>.  
288 These results highlight the importance of these receptors in the plant cell membrane and in the  
289 first line of defence in plant strategies to stop oomycete proliferation.

290 Moreover, an up accumulation of a H<sup>+</sup>-ATPase (ATPase 9) was also detected in 'Regent' APF at  
291 6hpi. Plasma membrane H<sup>+</sup>-ATPases maintain low cytoplasmic concentrations of H<sup>+</sup> and are  
292 dynamically regulated by biotic and abiotic events, being involved in signalling mechanisms  
293 during plant-pathogen interaction (reviewed in<sup>43</sup>). In response to internal and/or external cues,  
294 the trafficking of these plant pumps, to and from the plasma membrane, is also highly regulated.  
295 Indeed, we have identified an up accumulation of a protein involved in H<sup>+</sup>-ATPases translocation  
296 for the plasma membrane, the protein unc-13 homolog (Table 1). In Arabidopsis, a protein unc-  
297 13 homolog (PATROL1) controls the translocation of a H<sup>+</sup>-ATPase to the plasma membrane  
298 during stomata opening<sup>44</sup>. PATROL1 resides in the endosome and moves to and from the plasma  
299 membrane in response to environmental stimuli. When the stomata open, intracellular vesicles  
300 incorporate the plasma membrane and PATROL1 may be carried with them to tether the H<sup>+</sup>-  
301 ATPase into the plasma membrane<sup>44</sup>. Modifications of the H<sup>+</sup>-ATPases concentration in the  
302 plasma membrane act as an alternative mean to control stomata opening<sup>45</sup> and in the case of  
303 grapevine-*P. viticola* interaction, the stomata are the entry sites of the oomycete. Despite the  
304 role of these ATPases in grapevine remains to be elucidated, an up accumulation of ATPase 9  
305 and protein unc-13 homolog could suggest its involvement in stomata opening regulation during  
306 'Regent'-*P. viticola* interaction.

307 During 'Regent' response to *P. viticola* infection, the up accumulation of another  
308 transmembrane protein (TMP), ankyrin repeat-containing protein ITN1-like isoform X6 (ITN1),

309 was also detected (Table 1; Fig.5). Plant TMPs are essential for normal cellular homeostasis,  
 310 nutrient exchange, and responses to environmental cues <sup>46</sup>. ITN1 has been implicated in diverse  
 311 cellular processes such as signal transduction and, in Arabidopsis, this protein was proposed to  
 312 be related with abscisic acid signalling pathway and promotion of ROS production <sup>47</sup>.

313

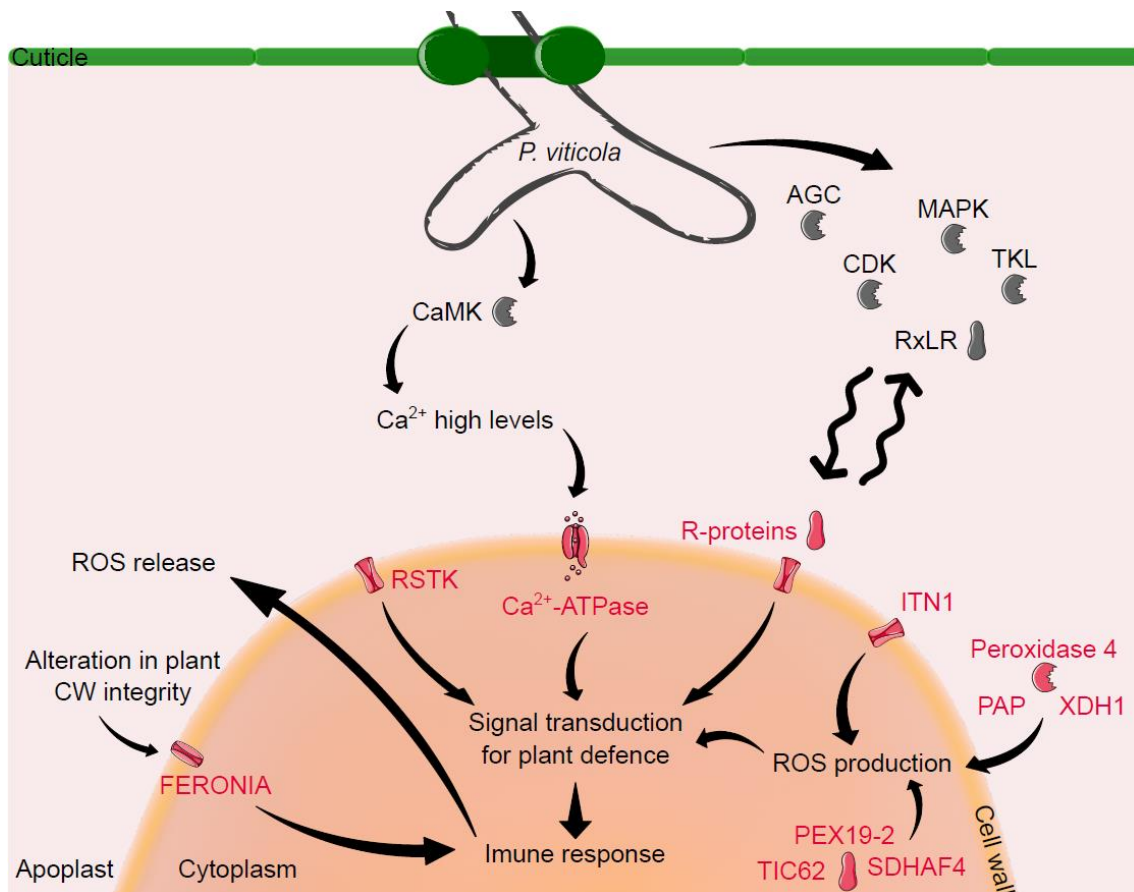

314

315 **Fig.5.** First communication events between host and pathogen: pathogen effectors are recognized by host  
 316 R proteins leading to a broader remodulation of proteins related to ROS production, signal transduction  
 317 and immune response establishment. Also, *P. viticola* is able to perceive host molecules activating  
 318 signalling transduction pathways. Proteins represented in red are positively modulated, proteins  
 319 represented in blue are negatively modulated (compared to mock-inoculated control). Pathogen proteins  
 320 are represented in grey. AGC - AGC kinase; Ca<sup>2+</sup>-ATPase - putative calcium-transporting ATPase 13; CaMK  
 321 - CAMKK kinase; CDK - CMGC CDK kinase; CW - cell wall; FERONIA - receptor-like protein kinase FERONIA;  
 322 ITN1 - ankyrin repeat-containing protein ITN1-like isoform X6; MAPK - CMGC MAPK kinase; PAP - purple  
 323 acid phosphatase; PEX19-2 - peroxisome biogenesis protein 19-2-like; RSTK - serine/threonine protein  
 324 kinase; ROS – reactive oxygen species; RxLR - RxLR-like proteins; R-proteins – includes RPV1-like isoform  
 325 X1 and RUN1-like isoform X1 and RSTKs; SDHAF4 - succinate dehydrogenase assembly factor 4; TIC62 -  
 326 protein TIC 62; TKL - TKL kinase; XDH1 - xanthine dehydrogenase 1.

327

### 328 3.1.3 Auxin signalling plays an important role in apoplast

329 Auxin is a plant growth hormone that plays a role in many aspects of growth and development,  
 330 and its signalling have been also highly associated to plant stress responses <sup>48,49</sup>. Several auxin

331 signalling-related proteins were up accumulated in APF after infection (Table 1): PINOID (a RSTK  
332 involved in the regulation of auxin signalling, being a positive regulator of cellular auxin efflux  
333 <sup>48</sup>); N-MYC DOWNREGULATED-LIKE2 (NDL2) protein (involved in auxin signalling through the  
334 positive regulation of auxin transporter protein 1 (AUX1) a carrier protein responsible for  
335 proton-driven auxin influx <sup>50</sup>); and NEDD8 (neural precursor cell expressed developmentally  
336 down-regulated 8), a post-translational modifiers of cullin proteins <sup>51</sup>. Cullin1 is one of the  
337 proteins that forms the “SKP1 cullin F-box” (SCF) ubiquitin ligase complex, that is involved in  
338 auxin signalling pathway <sup>52</sup>. Auxin homeostasis could be perturbed by stress-induced changes  
339 that affects the auxin efflux carriers and that modify the apoplastic pH disturbing the auxin  
340 uptake and distribution <sup>53,54</sup>. Indeed, in plant-pathogen interactions, auxin was shown to play a  
341 dual role both in regulating plant defence and in bacterial virulence <sup>55</sup>. It was shown that some  
342 pathogens may promote host auxin accumulation which leads to the suppression of salicylic acid  
343 (SA)-mediated host defences. On the other side, host auxin accumulation also modulated  
344 expression of particular pathogen virulence genes <sup>55</sup>. Despite the fact that none of the *P. viticola*  
345 effectors that we have found to be present in the APF was previously related to host auxin  
346 metabolism modulation, we may hypothesize that the modulation of auxin-related host proteins  
347 detected may reflect pathogen induced reprogramming. In fact, *P. viticola* being a biotroph,  
348 modulation of auxin metabolism leading to a depletion of SA-host defenses could be an infection  
349 strategy.

350

#### 351 **3.1.4 Apoplastic ROS signalling in grapevine immunity**

352 ROS play an important role in pathogen resistance by directly strengthening host cell walls via  
353 cross-linking of glycoproteins, promoting lipid peroxidation and activation of ROS-signalling  
354 networks <sup>56-58</sup>. We have previously shown that ROS accumulation occurs in ‘Regent’ at 6hpi with  
355 *P. viticola* <sup>13,59</sup>. In the APF proteome, proteins involved in ROS production, like peroxidase 4-like  
356 and purple acid phosphatase (PAP), are up-accumulated in response to the infection (Table 1;  
357 Fig.5), which is in accordance with our previous results. In Arabidopsis, PAP5 is induced in the  
358 early stages (6hpi) of *Pseudomonas syringae* infection and is involved in ROS generation <sup>60</sup>.  
359 Apoplastic ROS are very important in plant development and responses to stress conditions,  
360 being involved in the activation of signal transduction from extracellular spaces to the cell  
361 interior and may directly eliminate invading pathogens (reviewed in <sup>61-63</sup>). Small amounts of ROS  
362 lead to expression of stress-responsible genes as a plant resistance mechanism. However, high  
363 levels of ROS during a long period of time could culminate in damage of plant molecules and  
364 consequently in cell death. A strict regulation of ROS levels is thus important to induce a  
365 resistance response by the plant without promoting cell injury. In ‘Regent’ APF after infection  
366 with *P. viticola*, an up accumulation of xanthine dehydrogenase 1 (XDH1)-like isoform X1 was  
367 identified (Table 1; Fig.5). In Arabidopsis, this protein has dual and opposing roles in the ROS  
368 metabolism, contributing to H<sub>2</sub>O<sub>2</sub> production in epidermal cells to fight pathogen haustoria and  
369 producing uric acid to scavenge chloroplast H<sub>2</sub>O<sub>2</sub> in mesophyll cells to minimize oxidative  
370 damage <sup>64</sup>. In grapevine, the role of this protein was not been elucidated yet. However, in our  
371 results, an up accumulation of this ROS-related protein in ‘Regent’ APF after infection was  
372 detected, suggesting a possible involvement of XDH1 in plant defence mechanism through ROS  
373 metabolism regulation.

374 In whole leaf proteome, an up accumulation of ROS-related proteins such as peroxisome  
375 biogenesis protein 19-2-like (PEX19-2) <sup>13,65,66</sup>, protein TIC 62 (TIC62) <sup>67</sup> and succinate  
376 dehydrogenase assembly factor 4 (SDHAF4) <sup>68</sup> was observed at the same time that proteins like  
377 peroxidases and polyphenol oxidase <sup>69</sup> were less accumulated after infection (Table 2; Fig.5).  
378 Also, several heat shock proteins with different abundance levels in infected leaves, when  
379 compared to non-infected leaves, were identified (Table 2; <sup>70</sup>). As we already mentioned, the  
380 regulation of ROS metabolism during plant-pathogen interaction presents a complex dynamic.  
381 ROS are generated to overcome the infection but at the same time a tight regulation of high ROS  
382 levels is needed to protect the plant from oxidative stress (reviewed in <sup>61-63</sup>). This regulation is  
383 clearly evident in 'Regent' whole leaf and APF through the presence of several ROS-related  
384 proteins at different abundance levels, highlighting the importance of ROS in the 'Regent'  
385 defence mechanism against *P. viticola* as previously reported <sup>13,59</sup>.

386

### 387 **3.1.5 Calcium related signalling is prevalent in the APF at 6hpi**

388 In grapevine-*P. viticola* interaction, the increase in calcium leaf concentration in response to  
389 infection was already reported <sup>71</sup>. In 'Regent' APF proteome we have found an up accumulation  
390 of a putative calcium-transporting ATPase 13 (Ca<sup>2+</sup>-ATPase), (Table 1; Fig.5). Ca<sup>2+</sup>-ATPases play  
391 critical roles in sensing calcium fluctuations and relaying downstream signals by activating  
392 definitive targets, thus modulating corresponding metabolic pathways (reviewed in <sup>72</sup>). We have  
393 also detected an up accumulation of PINOID (Table 1). In Arabidopsis, PINOID activity is  
394 regulated by several calcium binding proteins, like a calmodulin-like protein, and the binding of  
395 these proteins to PINOID is enhanced by calcium <sup>73</sup>.

396 In *P. viticola* proteome, we have detected a Ca<sup>2+</sup>/calmodulin-dependent protein kinase (CaMK)  
397 that responds to high levels of calcium <sup>74</sup>, (Table 3; Fig.5). In pathogens, CaMKs are involved in  
398 several pathogenicity-related cellular mechanism. For example, in *C. albicans*, CaMKs functions  
399 in cell wall integrity and cellular redox regulation <sup>75</sup>; in *Neurospora*, a genus of Ascomycete fungi,  
400 CaMKs are related to growth and development of the pathogens <sup>76</sup>; and in *M. oryzae*, conidial  
401 germination and appressorial formation were delayed and virulence was attenuated in mutants  
402 of a CaMK <sup>77</sup>. However, in *P. viticola*, up to our knowledge, there is no information about the  
403 role of these type of kinases in oomycete development and/or pathogenicity.

404 At the same time, in 'Regent' whole leaf proteome, calcium-related proteins, like calcium  
405 sensing receptor <sup>78</sup> and CDGSH iron-sulfur domain-containing protein NEET <sup>79</sup>, are less  
406 accumulated after infection (Table 2).

407 These results suggest that, at such an early stage of the infection such as 6hpi, this calcium-  
408 associated response and regulation, as consequence of high levels of calcium in the infection  
409 site, is only taking place in the apoplast, which is the first contact point between plant and  
410 pathogen. As such, this regulation of the abundance of proteins associated with calcium  
411 metabolism in the leaf tissue is not evident.

412

413

### 414 **3.1.6 Activation of enzymes to disrupt oomycete structures**

415 One of the plant defence mechanisms during pathogen infection is the secretion of proteins  
416 involved in the degradation of pathogen structures to inhibit its growth and thus stop its  
417 proliferation. Oomycete cell walls consist mainly of  $\beta$ -1,3-glucans,  $\beta$ -1,6-glucans and cellulose  
418 rather than chitin, essential constituent of fungal cell walls <sup>80</sup>.

419 In grapevine APF after *P. viticola* infection an up accumulation of two glucan endo-1,3-beta-D-  
420 glucosidases and two GDSL esterase/lipases (GELPs) was observed (Table 1; Fig.4). The first are  
421 involved in the degradation of the polysaccharides of the pathogen cell wall and the GELPs  
422 possess lipase and antimicrobial activities that directly disrupt pathogen spore integrity <sup>81</sup>. In  
423 contrast, in whole leaf proteome, proteins like endo-1,3;1,4-beta-D-glucanase-like, endo-  
424 1,3;1,4-beta-D-glucanase-like isoform X3 and glucan endo-1,3-beta-glucosidase, are less  
425 abundant after infection when compared to the non-infected leaves (Table 2; Fig.4). These  
426 results suggest that a demobilization of these proteins from the inside of the cell to the APF  
427 might be occurring in response to *P. viticola* infection. The accumulation of these proteins in  
428 'Regent' APF leads to a disruption of oomycete structures as defence mechanism to inhibit the  
429 infection progress.

430 Moreover, a protein with antifungal activity, profilin 1, was found to be accumulated in 'Regent'  
431 whole leaf after *P. viticola* infection (Table 2). In Arabidopsis, this protein showed significant  
432 intracellular accumulation and cell-binding affinity for fungal cells, being capable to penetrate  
433 the fungal cell wall and membrane and act as inhibitor of fungal growth through ROS generation  
434 <sup>82</sup>.

435

### 436 **3.1.7 The importance of protein trafficking during grapevine-*P. viticola* interaction**

437 During plant-pathogen interaction, protein trafficking is very important for plant cells to quickly  
438 respond to pathogen infection. This trafficking occurs through the secretory and endocytic  
439 pathways that involves a complex set of proteins associated to vesicle formation, transport,  
440 docking, and fusion with the respective target membrane (reviewed in <sup>83</sup>). Clathrin-mediated  
441 endocytosis is the best-known mechanism of endocytosis in plants and involves the generation  
442 of small vesicles surrounded by a coat of clathrin and other associated proteins. During  
443 interaction of 'Regent' with the oomycete *P. viticola*, we observed an accumulation of clathrin  
444 assembly protein in the whole leaf proteome at the first hours of infection (Table 2). Indeed, the  
445 increase of proteins involved in the generation of trafficking vesicles, like clathrin assembly  
446 protein, reinforces our hypothesis of a relocation of specific proteins within the cell and to the  
447 APF as a plant defence mechanism. We have already mentioned the presence of the protein  
448 unc-13 homolog in the APF, which is responsible for the translocation of H<sup>+</sup>-ATPases to the  
449 plasma membrane <sup>44</sup> and we have also proposed the translocation of glucanases from the inside  
450 of the cell to the APF in response to the infection. These results highlight the massive molecular  
451 reprogramming that occurs when a plant is exposed to an environmental stress like pathogen  
452 infection.

453 Even for the pathogen, the molecular trafficking that occurs within the cells is very important  
454 for its growth and pathogenicity. In *P. viticola*, we have identified the small GTP-binding Rab28



455 (Ras homologue from brain), (Table 3). Rab proteins, which constitute the largest family of  
456 monomeric GTPases, are small proteins involved in many biological processes (reviewed in <sup>84</sup>).  
457 Members of this family participate in cell regulation, growth, morphogenesis, cell division, and  
458 virulence. Also, they are known as master regulators of intracellular bidirectional vesicle  
459 transport and, consequently, they localize in ER, vesicles, and multivesicular bodies, as well as  
460 in early and late endosomes <sup>85</sup>. Rabs have been implicated in regulating vesicle motility through  
461 interaction with both microtubules and actin filaments of the cytoskeleton <sup>86</sup>. In fungi, Rab  
462 participates in the secretion of metabolites and lytic enzymes and, in *Fusarium graminearum*,  
463 Rab GTPases are essential for membrane trafficking-dependent growth and pathogenicity <sup>87</sup>.  
464 However, in *P. viticola* the specific function of Rab proteins was not yet elucidated.

465

### 466 **3.1.8 Host and pathogen proteases as hubs during the interaction**

467 Proteases are enzymes that catalyse the breakdown of proteins into smaller polypeptides or  
468 single amino acids and play important roles in numerous biochemical processes. Pathogens  
469 produce a variety of proteases to degrade host tissue or to disrupt or modify host defence to  
470 create suitable conditions for successful colonization (reviewed in <sup>88,89</sup>). In *P. viticola*, a calpain-  
471 like protease was detected (Table 3) and a possible role in pathogenicity is suggested as previous  
472 studies in *M. oryzae* point out that calpains play multiple roles in conidiation, sexual  
473 reproduction, cell wall integrity and pathogenicity <sup>90</sup>. In *Saccharomyces cerevisiae* a calpain is  
474 also required for alkaline adaptation and sporulation <sup>91</sup>. Moreover, two trypsins and serine  
475 proteases involved in pathogenicity <sup>28</sup> were identified in *P. viticola* proteome during grapevine  
476 infection (Table 3).

477 Host subtilisin-like protease SBT5.3, was found more accumulated in the APF after infection. This  
478 accumulation is in accordance with the previously published studies on subtilisin-like proteases  
479 in grapevine-*P. viticola* interaction. A 10-fold change in SBT5.3 gene expression was observed  
480 also at 6hpi together with the increase of expression of several subtilase genes in 'Regent' <sup>15</sup>.  
481 Previously, it has also been hypothesized that subtilases play a crucial role in the establishment  
482 of the incompatible interaction between 'Regent' and *P. viticola*. In Arabidopsis, the subtilase  
483 SBT3.3 was shown to accumulate in the extracellular matrix after infection and to initiate a  
484 downstream immune signalling process <sup>92</sup>.

485 Our results highlight that both host and pathogen proteases are essential on the first contact  
486 hours and might play an important role in pathogen recognition and in the overcome of host  
487 defences.

488

### 489 **3.1.9 *P. viticola* proteome at 6hpi reflects actively regulated processes leading to** 490 **infection development**

491 In *P. viticola*, several kinases are putatively involved in the infection mechanism were also found  
492 in the APF at 6hpi (Table 3). We have detected, in the *P. viticola* proteome, a AGC kinase (cAMP-  
493 dependent, cGMP-dependent and protein kinase C), (Table 3; Fig.5). This protein family  
494 embraces a collection of Ser/Thr kinases that mediate a large number of cellular processes, such  
495 as cell growth, response to environmental stresses, and host immunity <sup>93-96</sup>. A study using kinase

496 inhibitors showed that kinase C protein plays a key role in the signal transduction mechanisms  
497 during maintenance of motility of the zoospores, essential during their migration to the stomata  
498 <sup>97</sup>. This evidence suggested that AGC kinases might be important pathogenic factors during  
499 pathogen infection, leading us to hypothesize that the *P. viticola* AGC kinase might be also  
500 relevant for the pathogenicity of this oomycete.

501 We have also detected a CDK (cyclin-dependent kinase) in *P. viticola* proteome that might be  
502 participating in pathogen infection mechanisms through cell polarization for the germ tube  
503 formation (Table 3; Fig.5). Indeed, several CDK members have been reported to be  
504 pathogenicity-related. In phytopathogenic fungus *U. maydis*, a CDK that is essential for growth  
505 and maintenance of cell polarity in this pathogen was identified. *cdk5ts* mutants showed to be  
506 drastically less virulent, probably because of the involvement of this protein in the induction of  
507 the polar growth required for the infection process <sup>98</sup>. In *P. viticola*, cell polarity guides the  
508 emergence and the growth of the germ tube during the infection mechanism, namely the  
509 penetration into the stomatal cavity <sup>99,100</sup>.

510 A MAPK (Mitogen-Activated Protein Kinase) has also been identified in the *P. viticola* proteome  
511 during the interaction with 'Regent' leaves (Table 3; Fig.5). MAPK cascades are very important  
512 in numerous cellular mechanisms in pathogens, regulating infection-related morphogenesis, cell  
513 wall remodelling, and high osmolarity stress response (reviewed in <sup>101,102</sup>). For example, in  
514 *Peronophythora litchii*, the oomycete pathogen causing litchi downy blight disease, a mutation  
515 in PIMAPK10, a MAPKP, led to a reduced mycelial growth rate, less sporulation and weakened  
516 pathogenicity, indicating an important function of MAPK signal pathway in oomycete  
517 pathogenicity <sup>103</sup>. In *Phytophthora sojae*, another oomycete, the authors showed that the MAPK  
518 PsSAK1 controls zoospore development and that it is necessary for pathogenicity <sup>104</sup>. In *M.*  
519 *oryzae*, initiation of appressorium formation is controlled by the cyclic AMP-protein kinase A  
520 pathway and the appressorium development and invasive growth is regulated by the Pmk1  
521 MAPK pathway <sup>105,106</sup>.

522 Tyrosine kinase-like (TKL) was also identified in *P. viticola* proteome after 6 hours of infection  
523 (Table 3; Fig.5). The TKL family is present in most eukaryotes and participates in many biological  
524 processes, however, information about its role in oomycetes is still scarce. In *P. guiyangense*,  
525 TKLs were up-regulated at early infection stages and silencing of TKLs led to reduced mycelia  
526 growth, zoospore production and alteration of stress responses. Also, silencing of TKLs resulted  
527 in a reduced virulence of *P. guiyangense* <sup>107</sup>, suggesting a key role of these kinases in pathogen  
528 infection strategies. In *P. infestans* kinome prediction 139 TKLs were identified, however their  
529 function is still unknown <sup>108</sup>.

530 Tetratricopeptide repeat (TPR)- and SEL1-containing proteins were also identified in *P. viticola*  
531 proteome (Table 3). These have been reported to be directly related to virulence-associated  
532 functions in bacterial pathogens <sup>109–111</sup>. In *Francisella tularensis*, a bacterial pathogen, a TPR-  
533 containing protein is a membrane-associated protein that is required for intracellular replication  
534 of the microbe, *in vivo* virulence, and heat stress tolerance <sup>112</sup>. In *P. infestans*, TPR was predicted  
535 as one of the most common domains within proteins <sup>113</sup>. However, up to our knowledge, the  
536 role of TPR-containing proteins in oomycete/fungus pathogenicity is still unknown. Regarding  
537 SEL1-containing proteins, in *Candida albicans*, a human fungal pathogen, these proteins are  
538 capable of shaping host immune response and the severity of fungal systemic infection and were

539 suggested as a novel fungus-derived pattern-associated molecular pattern (PAMP)<sup>114</sup>. However,  
540 up to our knowledge, there is no information about pathogen Sel1-containing proteins in plant-  
541 oomycete interaction.

542 Growth-related proteins were also detected in the *P. viticola* proteome sequencing (Table 3;  
543 Fig.4). These types of proteins are essential for the development of the pathogen structures  
544 during infection and besides they are not directly related to pathogenicity, their presence is an  
545 indicator of the pathogen growth and thus the progression of the infection in the host. In *P.*  
546 *viticola*, we have identified the SKN1 protein that is required for synthesis of the  $\beta$ -glucans, the  
547 major components of oomycete cell walls<sup>115</sup>. We have also identified the cell division cycle 5  
548 (Cdc5) protein, a highly conserved nucleic acid binding protein among eukaryotes that plays  
549 critical roles in development, however, in pathogens this protein is still poorly characterized<sup>116</sup>.

550

#### 551 **4. Conclusions**

552 Plants have developed several defence mechanisms to rapidly respond to pathogen attack. A  
553 fast recognition of the pathogen structures and activation of a defence response is primordial  
554 for the establishment of the incompatible interaction. Apoplast dynamics becomes an essential  
555 part of the battle between plants and pathogens. Here, we reveal for the first time the  
556 communication between grapevine extracellular and intracellular spaces at the first hours of  
557 interaction with *P. viticola* as well as the pathogen strategies to overcome grapevine defence.  
558 Our results highlight several defence mechanisms that are first activated and modulated in  
559 grapevine apoplast during infection, namely leading to plant cell wall plasticity to prevent  
560 disruption and disturbance of oomycete structures. Several proteins were also identified in the  
561 whole leaf proteome of 'Regent' that are closely related with the mechanisms involved in the  
562 apoplast modulation during infection, highlighting a tight communication between the APF and  
563 cell interior. Moreover, we have shown that *P. viticola* proteome is enriched in virulence-related  
564 proteins as a strategy to defeat the plant defence response and in growth-related proteins to  
565 develop the infection structures of the *P. viticola*.

566 The analysis of the plant and oomycete proteins involved in the first hours of the interaction  
567 between grapevine and *P. viticola* revealed that both sides are modulating their offense and  
568 defence strategies very early on. This reinforces the hypothesis that host-pathogen cross-talk in  
569 the first hours of interaction is highly dynamic and processes such as ETI, ETS, PTI and PTS may  
570 occur simultaneously.

571

#### 572 **5. Materials and Methods**

##### 573 **5.1 Plant material and inoculation experiments**

574 The tolerant *V. vinifera* cv. 'Regent' (VIVC number 4572) was used in this study. Wood cuttings  
575 from 'Regent' were obtained at the Portuguese Grapevine Germplasm Bank<sup>(117)</sup>; INIAV – Dois  
576 Portos, Portugal) and grown in 2.5 L pots in universal substrate under controlled conditions in a  
577 climate chamber at natural day/night rhythm, relative humidity 60% and a photosynthetic  
578 photon flux density of 300  $\mu\text{mol m}^{-2} \text{s}^{-1}$ .

579 For plant inoculation, downy mildew symptomatic leaves were harvested at the Portuguese  
580 Grapevine Germplasm Bank, sprayed with water and incubated overnight at 22°C in the dark to  
581 enhance sporulation. Next day, *P. viticola* sporangia were collected and their vitality was  
582 checked by microscopy. Inocula was propagated in the laboratory using the susceptible Müller-  
583 Thurgau.

584 For the experimental assay, 'Regent' abaxial leaf surface was sprayed with an inoculum solution  
585 containing  $3.5 \times 10^{-5}$  sporangia/mL. Mock-inoculations with water were also made and used as  
586 control. After inoculation, plants were kept in a greenhouse under high humidity conditions and  
587 25°C. The third to fifth fully expanded leaves beneath the shoot apex were harvest at 6 hours  
588 post-inoculation for apoplastic fluid extraction.

589

## 590 **5.2 Apoplastic fluid extraction**

591 Apoplastic fluid and total soluble protein extraction was performed as described in <sup>3</sup>. Briefly, 5  
592 volumes of 0.1 M ammonium acetate in methanol were used to precipitate the proteins  
593 overnight at -20°C. Samples were centrifuged at 4000 *g*, during 30 min at -10°C. Recovered  
594 pellets were washed (once with 0.1 M ammonium acetate in 100% methanol, twice with 80%  
595 (v/v) acetone and twice with 70% (v/v) ethanol), dried and resuspended in 0.03 M Tris-HCl buffer  
596 (pH 8.8) solution containing, 7 M urea, 2 M thiourea, 4% (w/v) CHAPS <sup>3</sup>. For cytoplasmic content  
597 contamination control, malate dehydrogenase assay was used according to <sup>3</sup>.

598

## 599 **5.3 MS-Based protein identification**

600 Separation and MS-based identification of proteins was performed as described in <sup>3</sup>. For  
601 identification of *V. vinifera* and *P. viticola* proteins, the genome assembly of *Vitis*12X database  
602 (GCF-000003745.3; 41 208 sequences, July 2009) and *Plasmopara viticola* genome database  
603 (INRA-PV221 isolate; 15 960 sequences, April 2018), respectively, were used via Mascot Daemon  
604 (v.2.6.0. Matrix Science), imported to Progenesis QIP and matched to peptide spectra. The  
605 Mascot research parameters were: a peptide tolerance of 20 ppm, a fragment mass tolerance  
606 of 0.3 Da, carbamidomethylation of cysteine as fixed modification and oxidation of methionine,  
607 N-terminal protein acetylation and tryptophan to kynurenine as variable modifications. Only the  
608 proteins identified with a significance MASCOT-calculated threshold P-value < 0.05, at least two  
609 significant peptides per proteins and one unique peptide per proteins were accepted.

610 For identification of *P. viticola* proteins present in apoplast of 'Regent' leaves inoculated with  
611 the oomycete, only the sequenced proteins that fulfilled the following two criteria at the same  
612 time were considered: be present in at least 2 of the biological replicates in the inoculated  
613 samples; and present in only 1 biological replicate or totally absent in control samples.  
614 Functional information about *P. viticola* proteins was obtained from *P. viticola* genome  
615 database. Protein secretion and effector function were predicted using TargetP 2.0  
616 (<https://services.healthtech.dtu.dk/service.php?TargetP-2.0>; <sup>118</sup>) and EffectorP  
617 (<http://effectorp.csiro.au/>; <sup>119</sup>), respectively.

618

#### 619 **5.4 Whole leaf proteome data**

620 For 'Regent' whole leaf proteome analysis, 6hpi with *P.viticola*, an already published dataset  
621 deposited on the ProteomeXchange Consortium via the PRIDE partner repository with the  
622 identifier PXD021613 was used <sup>13</sup>.

623

#### 624 **5.5 Statistical analysis of APF and whole leaf proteomes**

625 Principal Component Analysis (PCA) of 'Regent' APF proteome at 6hpi with *P. viticola* was  
626 performed using the program MetaboAnalyst 5.0 (<http://www.metaboanalyst.ca/>, <sup>120</sup>).

627 For the statistical analysis and consequent identification of differentially accumulated proteins,  
628 both whole leaf and APF proteomes of 'Regent' leaves inoculated with *P. viticola* (6hpi) were  
629 matched to the respective control samples, allowing a comparative analysis between datasets.  
630 This was done by applying Rank Products (RP), a powerful statistical test designed for identifying  
631 differentially expressed genes in microarrays experiments <sup>121</sup>, nevertheless, it also provides a  
632 simple and straightforward tool to determine the significance of observed changes in other  
633 omics data. RP procedure makes weak assumptions about the data and provides a strong  
634 performance with very small data sets, allowing for the control of the false discovery rate (FDR)  
635 and familywise error rate (probability of a type I error) in the multiple testing situation.

636

#### 637 **5.5 Subcellular location prediction of APF DAPs**

638 For the APF DAPs from grapevine, a subcellular localization prediction was performed using  
639 SignalP 5.0, TargetP 2.0 and SecretomeP 2.0 servers (<http://www.cbs.dtu.dk/services/>, <sup>122-124</sup>),  
640 ApoplastP (<http://apoplastp.csiro.au/>, <sup>125</sup>), BUSCA (<http://busca.biocomp.unibo.it/>, <sup>126</sup>), PredSL  
641 (<http://aias.biol.uoa.gr/PredSL/>, <sup>127</sup>), Mercator ([https://www.plabipd.de/portal/mercator-](https://www.plabipd.de/portal/mercator-sequence-annotation)  
642 [sequence-annotation](https://www.plabipd.de/portal/mercator-sequence-annotation), <sup>128</sup>) and Blast2GO (version 5.2.5, <https://www.blast2go.com/>, <sup>129</sup>). The  
643 default parameters were used for all the programs.

644 Based on the subcellular localization prediction, the APF proteins were grouped in 4 different  
645 classes according to the following criteria (as described in <sup>3</sup>): (1) proteins with a predicted signal  
646 peptide (SP) by SignalP (Class I); (2) proteins predicted to be secreted through classical secretory  
647 pathways but, by other software than SignalP 5.0 (Class II); (3) proteins predicted to be secreted  
648 by unconventional secretory pathways (USP) based on SecretomeP (Class III), and proteins with  
649 no predicted secretion (Class IV). Only the proteins belonging to the Class I, II and III were  
650 considered for further functional analysis.

651

#### 652 **5.6 APF and whole leaf proteome data functional analysis**

653 Functional annotation based on Gene Ontology annotation (Biological Process) using Blast2GO  
654 software was performed.

655

656 **Data Availability:** The mass spectrometry proteomics data have been deposited to the  
657 ProteomeXchange Consortium via the PRIDE partner repository with the dataset identifier  
658 PXD030508 and 10.6019/PXD030508.

659

660 **Acknowledgments:** Portuguese Foundation for Science and Technology (FCT, Portugal) funded  
661 Joana Figueiredo fellowship (SFRH/BD/137066/2018). FCT funded the Research Units and  
662 project: BioISI (UIDB/04046/2020 and UIDP/04046/2020), LEAF (UID/AGR/04129/2019) and  
663 CEaul (UIDB/00006/2020), and the project PTDC/BIA-BQM/28539/2017. We thank Dr. Ana Rita  
664 Cavaco, Dr. Marisa Maia and Dr. Maria do Céu Silva for the support in the inoculation assay and  
665 APF extraction protocol.

666

667 **Conflicts of Interest:** The authors declare no conflict of interest. The funders had no role in the  
668 design of the study; in the collection, analyses, or interpretation of data; in the writing of the  
669 manuscript, or in the decision to publish the results.

670

671 **Author Contributions:** J.F. and A.F. conceived the study; J.F., R.B.S, L.G.G. and A.F. were  
672 responsible for the plant material and performed the APF extraction method; J.F. prepared the  
673 samples for nanoLS-MS/MS analysis; C.C.L. and J.R. performed the proteome profiling by  
674 nanoLC-MS/MS; L.S. performed the statistical analysis; J.F. and A.F. analysed the data and wrote  
675 the manuscript. All authors have read and agreed to the published version of the manuscript.

676

## 677 **References**

- 678 1 Jones JDG, Dangl JL. The plant immune system. *Nature* 2006; **444**: 323–329.
- 679 2 Delaunoy B, Colby T, Belloy N *et al.* Large-scale proteomic analysis of the grapevine leaf  
680 apoplastic fluid reveals mainly stress-related proteins and cell wall modifying enzymes.  
681 *BMC Plant Biology* 2013; **13**: 24.
- 682 3 Figueiredo J, Cavaco AR, Guerra-Guimarães L *et al.* An apoplastic fluid extraction method  
683 for the characterization of grapevine leaves proteome and metabolome from a single  
684 sample. *Physiologia Plantarum* 2021; **171**: 343–357.
- 685 4 Pechanova O, Hsu C-Y, Adams JP *et al.* Apoplast proteome reveals that extracellular matrix  
686 contributes to multistress response in poplar. *BMC Genomics* 2010; **11**: 674.
- 687 5 Dani V, Simon WJ, Duranti M, Croy RRD. Changes in the tobacco leaf apoplast proteome in  
688 response to salt stress. *PROTEOMICS* 2005; **5**: 737–745.
- 689 6 Fecht-Christoffers MM, Braun H-P, Lemaitre-Guillier C, VanDorselaer A, Horst WJ. Effect  
690 of manganese toxicity on the proteome of the leaf apoplast in cowpea. *Plant Physiology*  
691 2003; **133**: 1935–1946.
- 692 7 Zhou L, Bokhari SA, Dong C-J, Liu J-Y. Comparative proteomics analysis of the root  
693 apoplasts of rice seedlings in response to hydrogen peroxide. *PLOS ONE* 2011; **6**: e16723.

- 694 8 Guerra-Guimarães L, Tenente R, Pinheiro C *et al.* Proteomic analysis of apoplastic fluid of  
695 *Coffea arabica* leaves highlights novel biomarkers for resistance against *Hemileia vastatrix*.  
696 *Frontiers in Plant Science* 2015; **6**. doi:10.3389/fpls.2015.00478.
- 697 9 Guerra-Guimarães L, Vieira A, Chaves I *et al.* Effect of greenhouse conditions on the leaf  
698 apoplastic proteome of *Coffea arabica* plants. *Journal of Proteomics* 2014; **104**: 128–139.
- 699 10 Floerl S, Majcherczyk A, Possienke M *et al.* *Verticillium longisporum* infection affects the  
700 leaf apoplastic proteome, metabolome, and cell wall properties in *Arabidopsis thaliana*.  
701 *PLOS ONE* 2012; **7**: e31435.
- 702 11 Yu Y, Zhang Y, Yin L, Lu J. The mode of host resistance to *Plasmopara viticola* infection of  
703 grapevines. *Phytopathology* 2012; **102**: 1094–1101.
- 704 12 Welter LJ, Göktürk-Baydar N, Akkurt M *et al.* Genetic mapping and localization of  
705 quantitative trait loci affecting fungal disease resistance and leaf morphology in grapevine  
706 (*Vitis vinifera* L). *Mol Breeding* 2007; **20**: 359–374.
- 707 13 B. Santos R, Nascimento R, V. Coelho A, Figueiredo A. Grapevine–downy Mildew  
708 rendezvous: proteome analysis of the first hours of an incompatible interaction. *Plants*  
709 2020; **9**: 1498.
- 710 14 Guerreiro A, Figueiredo J, Sousa Silva M, Figueiredo A. Linking jasmonic acid to grapevine  
711 resistance against the biotrophic oomycete *Plasmopara viticola*. *Front Plant Sci* 2016; **7**:  
712 565.
- 713 15 Figueiredo J, Costa GJ, Maia M *et al.* Revisiting *Vitis vinifera* subtilase gene family: a  
714 possible role in grapevine resistance against *Plasmopara viticola*. *Front Plant Sci* 2016; **7**:  
715 1783.
- 716 16 Cavaco AR, Laureano G, Cunha J, Eiras-Dias J, Matos AR, Figueiredo A. Fatty acid  
717 modulation and desaturase gene expression are differentially triggered in grapevine  
718 incompatible interaction with biotrophs and necrotrophs. *Plant Physiology and*  
719 *Biochemistry* 2021; **163**: 230–238.
- 720 17 Laureano G, Figueiredo J, Cavaco AR *et al.* The interplay between membrane lipids and  
721 phospholipase A family members in grapevine resistance against *Plasmopara viticola*. *Sci*  
722 *Rep* 2018; **8**: 14538.
- 723 18 Serrano M, Coluccia F, Torres M, L’Haridon F, Métraux J-P. The cuticle and plant defense  
724 to pathogens. *Front Plant Sci* 2014; **5**: 274.
- 725 19 Kang J, Park J, Choi H *et al.* Plant ABC transporters. *Arabidopsis Book* 2011; **9**: e0153.
- 726 20 Borghi L, Kang J, de Brito Francisco R. Filling the gap: functional clustering of ABC proteins  
727 for the investigation of hormonal transport *in planta*. *Frontiers in Plant Science* 2019; **10**:  
728 422.
- 729 21 Bessire M, Borel S, Fabre G *et al.* A Member of the PLEIOTROPIC DRUG RESISTANCE family  
730 of ATP binding cassette transporters is required for the formation of a functional cuticle in  
731 *Arabidopsis*. *The Plant Cell* 2011; **23**: 1958–1970.

- 732 22 Wang Y, Sun Y, You Q *et al.* Three fatty acyl-coenzyme A reductases, BdFAR1, BdFAR2 and  
733 BdFAR3, are involved in cuticular wax primary alcohol biosynthesis in *Brachypodium*  
734 *distachyon*. *Plant and Cell Physiology* 2018; **59**: 527–543.
- 735 23 Khizar M, Shi J, Haroon U *et al.* RNA-Seq based exploration of differentially expressed  
736 genes (DEGs) in cotton (*Gossypium hirsutum* L.) upon infection with *Aspergillus*  
737 *tubingensis*. *Research Square* 2021. doi:10.21203/rs.3.rs-770815/v1.
- 738 24 Liu N, Sun Y, Pei Y *et al.* A pectin methylesterase inhibitor enhances resistance to  
739 *Verticillium* wilt. *Plant Physiol* 2018; **176**: 2202–2220.
- 740 25 Chávez Montes RA, Ranocha P, Martinez Y *et al.* Cell wall modifications in Arabidopsis  
741 plants with altered alpha-L-arabinofuranosidase activity. *Plant Physiol* 2008; **147**: 63–77.
- 742 26 Franken ACW, Werner ER, Haas H *et al.* The role of coproporphyrinogen III oxidase and  
743 ferrochelatase genes in heme biosynthesis and regulation in *Aspergillus niger*. *Appl*  
744 *Microbiol Biotechnol* 2013; **97**: 9773–9785.
- 745 27 Leger RJS, Joshi L, Roberts DWY 1997. Adaptation of proteases and carbohydrases of  
746 saprophytic, phytopathogenic and entomopathogenic fungi to the requirements of their  
747 ecological niches. *Microbiology*; **143**: 1983–1992.
- 748 28 Dubovenko AG, Dunaevsky YE, Belozersky MA, Oppert B, Lord JC, Elpidina EN. Trypsin-like  
749 proteins of the fungi as possible markers of pathogenicity. *Fungal Biology* 2010; **114**: 151–  
750 159.
- 751 29 Monaghan J, Zipfel C. Plant pattern recognition receptor complexes at the plasma  
752 membrane. *Current Opinion in Plant Biology* 2012; **15**: 349–357.
- 753 30 Hammond-Kosack KE, Jones JD. Resistance gene-dependent plant defense responses.  
754 *Plant Cell* 1996; **8**: 1773–1791.
- 755 31 Morel J-B, Dangl JL. The hypersensitive response and the induction of cell death in plants.  
756 *Cell Death Differ* 1997; **4**: 671–683.
- 757 32 Dong X. Genetic dissection of systemic acquired resistance. *Current Opinion in Plant*  
758 *Biology* 2001; **4**: 309–314.
- 759 33 Métraux J-P. Systemic acquired resistance and salicylic acid: current state of knowledge.  
760 *European Journal of Plant Pathology* 2001; **107**: 13–18.
- 761 34 Anderson RG, Deb D, Fedkenheuer K, McDowell JM. Recent progress in RxLR effector  
762 research. *MPMI* 2015; **28**: 1063–1072.
- 763 35 Wang Y, Wang Y. *Phytophthora sojae* effectors orchestrate warfare with host immunity.  
764 *Curr Opin Microbiol* 2018; **46**: 7–13.
- 765 36 Feechan A, Anderson C, Torregrosa L *et al.* Genetic dissection of a TIR-NB-LRR locus from  
766 the wild North American grapevine species *Muscadinia rotundifolia* identifies paralogous  
767 genes conferring resistance to major fungal and oomycete pathogens in cultivated  
768 grapevine. *The Plant Journal* 2013; **76**: 661–674.



- 769 37 Williams S, Yin L, Foley G *et al.* Structure and function of the TIR domain from the grape  
770 NLR protein RPV1. *Frontiers in Plant Science* 2016; **7**: 1850.
- 771 38 Horsefield S, Burdett H, Zhang X *et al.* NAD<sup>+</sup> cleavage activity by animal and plant TIR  
772 domains in cell death pathways. *Science* 2019; **365**: 793–799.
- 773 39 Afzal AJ, Wood AJ, Lightfoot DA. Plant receptor-like serine threonine kinases: roles in  
774 signaling and plant defense. *Mol Plant Microbe Interact* 2008; **21**: 507–517.
- 775 40 Romeis T. Protein kinases in the plant defence response. *Current Opinion in Plant Biology*  
776 2001; **4**: 407–414.
- 777 41 Ji D, Chen T, Zhang Z, Li B, Tian S. Versatile roles of the receptor-like kinase FERONIA in  
778 plant growth, development and host-pathogen interaction. *Int J Mol Sci* 2020; **21**: 7881.
- 779 42 Kandel SL, Hulse-Kemp AM, Stoffel K *et al.* Transcriptional analyses of differential cultivars  
780 during resistant and susceptible interactions with *Peronospora effusa*, the causal agent of  
781 spinach downy mildew. *Sci Rep* 2020; **10**: 6719.
- 782 43 Fuglsang AT, Palmgren M. Proton and calcium pumping P-type ATPases and their  
783 regulation of plant responses to the environment. *Plant Physiology* 2021.  
784 doi:10.1093/plphys/kiab330.
- 785 44 Hashimoto-Sugimoto M, Higaki T, Yaeno T *et al.* A Munc13-like protein in Arabidopsis  
786 mediates H<sup>+</sup>-ATPase translocation that is essential for stomatal responses. *Nat Commun*  
787 2013; **4**: 2215.
- 788 45 Gaxiola RA, Palmgren MG, Schumacher K. Plant proton pumps. *FEBS Letters* 2007; **581**:  
789 2204–2214.
- 790 46 Lee HC, Carroll A, Crossett B, Connolly A, Batarseh A, Djordjevic MA. Improving the  
791 identification and coverage of plant transmembrane proteins in Medicago using bottom–  
792 up proteomics. *Frontiers in Plant Science* 2020; **11**: 1925.
- 793 47 Sakamoto H, Matsuda O, Iba K. ITN1, a novel gene encoding an ankyrin-repeat protein that  
794 affects the ABA-mediated production of reactive oxygen species and is involved in salt-  
795 stress tolerance in *Arabidopsis thaliana*. *The Plant Journal* 2008; **56**: 411–422.
- 796 48 Saini K, AbdElgawad H, Markakis MN *et al.* Perturbation of auxin homeostasis and signaling  
797 by PINOID overexpression induces stress responses in Arabidopsis. *Front Plant Sci* 2017; **8**:  
798 1308.
- 799 49 Kazan K, Manners JM. Linking development to defense: auxin in plant–pathogen  
800 interactions. *Trends in Plant Science* 2009; **14**: 373–382.
- 801 50 Mudgil Y, Uhrig JF, Zhou J, Temple B, Jiang K, Jones AM. Arabidopsis N-MYC  
802 DOWNREGULATED-LIKE1, a positive regulator of auxin transport in a G protein–mediated  
803 pathway. *Plant Cell* 2009; **21**: 3591–3609.
- 804 51 Parry G, Estelle M. Regulation of cullin-based ubiquitin ligases by the Nedd8/RUB  
805 ubiquitin-like proteins. *Semin Cell Dev Biol* 2004; **15**: 221–229.

- 806 52 Ren C, Pan J, Peng W *et al.* Point mutations in Arabidopsis Cullin1 reveal its essential role  
807 in jasmonate response. *Plant J* 2005; **42**: 514–524.
- 808 53 Potters G, Pasternak TP, Guisez Y, Palme KJ, Jansen MAK. Stress-induced morphogenic  
809 responses: growing out of trouble? *Trends in Plant Science* 2007; **12**: 98–105.
- 810 54 Potters G, Pasternak TP, Guisez Y, Jansen M a. K. Different stresses, similar morphogenic  
811 responses: integrating a plethora of pathways. *Plant, Cell & Environment* 2009; **32**: 158–  
812 169.
- 813 55 Djami-Tchatchou AT, Harrison GA, Harper CP *et al.* Dual role of auxin in regulating plant  
814 defense and bacterial virulence gene expression during *Pseudomonas syringae* PtoDC3000  
815 pathogenesis. *MPMI* 2020; **33**: 1059–1071.
- 816 56 Apel K, Hirt H. Reactive oxygen species: metabolism, oxidative stress, and signal  
817 transduction. *Annual Review of Plant Biology* 2004; **55**: 373–399.
- 818 57 Baxter A, Mittler R, Suzuki N. ROS as key players in plant stress signalling. *Journal of*  
819 *Experimental Botany* 2014; **65**: 1229–1240.
- 820 58 Waszczak C, Carmody M, Kangasjärvi J. Reactive oxygen species in plant signaling. *Annual*  
821 *Review of Plant Biology* 2018; **69**: 209–236.
- 822 59 Figueiredo A, Martins J, Sebastiana M *et al.* Specific adjustments in grapevine leaf  
823 proteome discriminating resistant and susceptible grapevine genotypes to *Plasmopara*  
824 *viticola*. *Journal of Proteomics* 2017; **152**: 48–57.
- 825 60 Ravichandran S, Stone S, Benkel B, Zhang J, Berrue F, Prithiviraj B. Optimal level of purple  
826 acid phosphatase 5 is required for maintaining complete resistance to *Pseudomonas*  
827 *syringae*. *Frontiers in Plant Science* 2015; **6**: 568.
- 828 61 Podgórska A, Burian M, Szal B. Extra-cellular but extra-ordinarily important for cells:  
829 apoplastic reactive oxygen species metabolism. *Frontiers in Plant Science* 2017; **8**: 1353.
- 830 62 Shapiguzov A, Vainonen J, Wrzaczek M, Kangasjärvi J. ROS-talk – how the apoplast, the  
831 chloroplast, and the nucleus get the message through. *Frontiers in Plant Science* 2012; **3**:  
832 292.
- 833 63 Qi J, Wang J, Gong Z, Zhou J-M. Apoplastic ROS signaling in plant immunity. *Current Opinion*  
834 *in Plant Biology* 2017; **38**: 92–100.
- 835 64 Ma X, Wang W, Bittner F *et al.* Dual and opposing roles of xanthine dehydrogenase in  
836 defense-associated reactive oxygen species metabolism in Arabidopsis. *Plant Cell* 2016;  
837 **28**: 1108–1126.
- 838 65 Hadden DA, Phillipson BA, Johnston KA *et al.* Arabidopsis PEX19 is a dimeric protein that  
839 binds the peroxin PEX10. *Mol Membr Biol* 2006; **23**: 325–336.
- 840 66 Su T, Li W, Wang P, Ma C. Dynamics of peroxisome homeostasis and its role in stress  
841 response and signaling in plants. *Frontiers in Plant Science* 2019; **10**: 705.
- 842 67 Kückler M, Decker S, Hörmann F, Soll J, Heins L. Protein import into chloroplasts involves  
843 redox-regulated proteins. *EMBO J* 2002; **21**: 6136–6145.

- 844 68 Huang S, Braun H-P, Gawryluk RMR, Millar AH. Mitochondrial complex II of plants: subunit  
845 composition, assembly, and function in respiration and signaling. *The Plant Journal* 2019;  
846 **98**: 405–417.
- 847 69 Zhang J, Sun X. Recent advances in polyphenol oxidase-mediated plant stress responses.  
848 *Phytochemistry* 2021; **181**: 112588.
- 849 70 Scarpeci TE, Zanor MI, Valle EM. Investigating the role of plant heat shock proteins during  
850 oxidative stress. *Plant Signal Behav* 2008; **3**: 856–857.
- 851 71 Cesco S, Tolotti A, Nadalini S *et al.* *Plasmopara viticola* infection affects mineral elements  
852 allocation and distribution in *Vitis vinifera* leaves. *Sci Rep* 2020; **10**: 18759.
- 853 72 Huda KMdK, Banu MstSA, Tuteja R, Tuteja N. Global calcium transducer P-type Ca<sup>2+</sup>-  
854 ATPases open new avenues for agriculture by regulating stress signalling. *Journal of*  
855 *Experimental Botany* 2013; **64**: 3099–3109.
- 856 73 Rademacher E, Offringa R. Evolutionary adaptations of plant AGC kinases: from light  
857 signaling to cell polarity regulation. *Frontiers in Plant Science* 2012; **3**: 250.
- 858 74 Chang J-Y, Nakahata Y, Hayano Y, Yasuda R. Mechanisms of Ca<sup>2+</sup>/calmodulin-dependent  
859 kinase II activation in single dendritic spines. *Nat Commun* 2019; **10**: 2784.
- 860 75 Ding X, Yu Q, Zhang B *et al.* The type II Ca<sup>2+</sup>/calmodulin-dependent protein kinases are  
861 involved in the regulation of cell wall integrity and oxidative stress response in *Candida*  
862 *albicans*. *Biochemical and Biophysical Research Communications* 2014; **446**: 1073–1078.
- 863 76 Yang Y, Cheng P, Zhi G, Liu Y. Identification of a calcium/calmodulin-dependent protein  
864 kinase that phosphorylates the *Neurospora* circadian clock protein FREQUENCY. *Journal of*  
865 *Biological Chemistry* 2001; **276**: 41064–41072.
- 866 77 Liu X-H, Lu J-P, Dong B, Gu Y, Lin F-C. Disruption of MoCMK1, encoding a putative  
867 calcium/calmodulin-dependent kinase, in *Magnaporthe oryzae*. *Microbiological Research*  
868 2010; **165**: 402–410.
- 869 78 Wang W-H, Zheng H-L. Mechanisms for calcium sensing receptor-regulated stomatal  
870 closure in response to the extracellular calcium signal. *Plant Signaling & Behavior* 2012; **7**:  
871 289–291.
- 872 79 Nechushtai R, Karmi O, Zuo K *et al.* The balancing act of NEET proteins: iron, ROS, calcium  
873 and metabolism. *Biochimica et Biophysica Acta (BBA) - Molecular Cell Research* 2020;  
874 **1867**: 118805.
- 875 80 Mélida H, Sandoval-Sierra JV, Diéguez-Uribeondo J, Bulone V. Analyses of extracellular  
876 carbohydrates in oomycetes unveil the existence of three different cell wall types.  
877 *Eukaryotic Cell* 2013; **12**: 194–203.
- 878 81 Oh IS, Park AR, Bae MS *et al.* Secretome analysis reveals an Arabidopsis lipase involved in  
879 defense against *Alternaria brassicicola*. *The Plant Cell* 2005; **17**: 2832–2847.
- 880 82 Park S-C, Kim IR, Kim J-Y *et al.* Molecular mechanism of *Arabidopsis thaliana* profilins as  
881 antifungal proteins. *Biochim Biophys Acta Gen Subj* 2018; **1862**: 2545–2554.

- 882 83 Nathalie Leborgne-Castel, Bouhidel K. Plasma membrane protein trafficking in plant–  
883 microbe interactions: a plant cell point of view. *Front Plant Sci* 2014; **5**: 735.
- 884 84 Dautt-Castro M, Rosendo-Vargas M, Casas-Flores S. The small GTPases in fungal signaling  
885 conservation and function. *Cells* 2021; **10**: 1039.
- 886 85 Higuchi Y. Membrane traffic related to endosome dynamics and protein secretion in  
887 filamentous fungi. *Bioscience, Biotechnology, and Biochemistry* 2021; **85**: 1038–1045.
- 888 86 Zerial M, McBride H. Rab proteins as membrane organizers. *Nat Rev Mol Cell Biol* 2001; **2**:  
889 107–117.
- 890 87 Zheng H, Zheng W, Wu C *et al.* Rab GTPases are essential for membrane trafficking-  
891 dependent growth and pathogenicity in *Fusarium graminearum*. *Environ Microbiol* 2015;  
892 **17**: 4580–4599.
- 893 88 Marshall NC, Finlay BB, Overall CM. Sharpening host defenses during infection: proteases  
894 cut to the chase. *Molecular & Cellular Proteomics* 2017; **16**: S161–S171.
- 895 89 Figaj D, Ambroziak P, Przepiora T, Skorko-Glonek J. The role of proteases in the virulence  
896 of plant pathogenic bacteria. *International Journal of Molecular Sciences* 2019; **20**: 672.
- 897 90 Liu X-H, Ning G-A, Huang L-Y *et al.* Calpains are involved in asexual and sexual  
898 development, cell wall integrity and pathogenicity of the rice blast fungus. *Sci Rep* 2016; **6**:  
899 31204.
- 900 91 Futai E, Maeda T, Sorimachi H, Kitamoto K, Ishiura S, Suzuki K. The protease activity of a  
901 calpain-like cysteine protease in *Saccharomyces cerevisiae* is required for alkaline  
902 adaptation and sporulation. *Mol Gen Genet* 1999; **260**: 559–568.
- 903 92 Ramírez V, López A, Mauch-Mani B, Gil MJ, Vera P. An extracellular subtilase switch for  
904 immune priming in *Arabidopsis*. *PLoS Pathogens* 2013; **9**: e1003445.
- 905 93 Alves de Castro P, dos Reis TF, Dolan SK *et al.* The *Aspergillus fumigatus* SchASCH9 kinase  
906 modulates SakAHOG1 MAP kinase activity and it is essential for virulence. *Molecular*  
907 *Microbiology* 2016; **102**: 642–671.
- 908 94 Fang W, Pava-ripoll M, Wang S, St. Leger R. Protein kinase A regulates production of  
909 virulence determinants by the entomopathogenic fungus, *Metarhizium anisopliae*. *Fungal*  
910 *Genetics and Biology* 2009; **46**: 277–285.
- 911 95 Wang C, Shen D, Wang J *et al.* An AGC kinase, PgAGC1 regulates virulence in the  
912 entomopathogenic oomycete *Pythium guiyangense*. *Fungal Biology* 2019; **123**: 87–93.
- 913 96 Berndt P, Lanver D, Kahmann R. The AGC Ser/Thr kinase Aga1 is essential for appressorium  
914 formation and maintenance of the actin cytoskeleton in the smut fungus *Ustilago maydis*.  
915 *Molecular Microbiology* 2010; **78**: 1484–1499.
- 916 97 Islam MT, von Tiedemann A, Laatsch H. Protein kinase C is likely to be involved in  
917 zoosporogenesis and maintenance of flagellar motility in the peronosporomycete  
918 zoospores. *Mol Plant Microbe Interact* 2011; **24**: 938–947.

- 919 98 Castillo-Lluva S, Alvarez-Tabarés I, Weber I, Steinberg G, Pérez-Martín J. Sustained cell  
920 polarity and virulence in the phytopathogenic fungus *Ustilago maydis* depends on an  
921 essential cyclin-dependent kinase from the Cdk5/Pho85 family. *Journal of Cell Science*  
922 2007; **120**: 1584–1595.
- 923 99 Kiefer B, Riemann M, Büche C, Kassemeyer H-H, Nick P. The host guides morphogenesis  
924 and stomatal targeting in the grapevine pathogen *Plasmopara viticola*. *Planta* 2002; **215**:  
925 387–393.
- 926 100 Riemann M, Büche C, Kassemeyer H-H, Nick P. Cytoskeletal responses during early  
927 development of the downy mildew of grapevine (*Plasmopara viticola*). *Protoplasma* 2002;  
928 **219**: 13–22.
- 929 101 Hamel L-P, Nicole M-C, Duplessis S, Ellis BE. Mitogen-activated protein kinase signaling in  
930 plant-interacting fungi: distinct messages from conserved messengers. *The Plant Cell* 2012;  
931 **24**: 1327–1351.
- 932 102 Zhao X, Mehrabi R, Xu J-R. Mitogen-activated protein kinase pathways and fungal  
933 pathogenesis. *Eukaryotic Cell* 2007; **6**: 1701–1714.
- 934 103 Jiang L, Situ J, Deng YZ *et al.* PIMAPK10, a mitogen-activated protein kinase (MAPK) in  
935 *Peronophythora litchii*, is required for mycelial growth, sporulation, laccase activity, and  
936 plant infection. *Front Microbiol* 2018; **9**: 426.
- 937 104 Li A, Wang Y, Tao K *et al.* PsSAK1, a stress-activated MAP kinase of *Phytophthora sojae*, is  
938 required for zoospore viability and infection of soybean. *Mol Plant Microbe Interact* 2010;  
939 **23**: 1022–1031.
- 940 105 Zhang H, Xue C, Kong L, Li G, Xu J-R. A Pmk1-interacting gene is involved in appressorium  
941 differentiation and plant infection in *Magnaporthe oryzae*. *Eukaryot Cell* 2011; **10**: 1062–  
942 1070.
- 943 106 Yue X, Que Y, Deng S *et al.* The cyclin dependent kinase subunit Cks1 is required for  
944 infection-associated development of the rice blast fungus *Magnaporthe oryzae*. *Environ*  
945 *Microbiol* 2017; **19**: 3959–3981.
- 946 107 Shen D, Dong Y, Wei Y *et al.* Genome-wide and functional analyses of tyrosine kinase-like  
947 family genes reveal potential roles in development and virulence in mosquito pathogen  
948 *Pythium guiyangense*. *Fungal Genet Biol* 2019; **130**: 11–18.
- 949 108 Judelson HS, Ah-Fong AM. The kinome of *Phytophthora infestans* reveals oomycete-  
950 specific innovations and links to other taxonomic groups. *BMC Genomics* 2010; **11**: 700.
- 951 109 Allan RK, Ratajczak T. Versatile TPR domains accommodate different modes of target  
952 protein recognition and function. *Cell Stress Chaperones* 2011; **16**: 353–367.
- 953 110 Mittl PRE, Schneider-Brachert W. Sel1-like repeat proteins in signal transduction. *Cell*  
954 *Signal* 2007; **19**: 20–31.
- 955 111 Cerveny L, Straskova A, Dankova V *et al.* Tetratricopeptide repeat motifs in the world of  
956 bacterial pathogens: role in virulence mechanisms. *Infect Immun* 2013; **81**: 629–635.

- 957 112 Dankova V, Balonova L, Straskova A *et al.* Characterization of tetratricopeptide repeat-like  
958 proteins in *Francisella tularensis* and identification of a novel locus required for virulence.  
959 *Infect Immun* 2014; **82**: 5035–5048.
- 960 113 Randall TA, Dwyer RA, Huitema E *et al.* Large-scale gene discovery in the oomycete  
961 *Phytophthora infestans* reveals likely components of phytopathogenicity shared with true  
962 fungi. *MPMI* 2005; **18**: 229–243.
- 963 114 Wang W, Deng Z, Wu H *et al.* A small secreted protein triggers a TLR2/4-dependent  
964 inflammatory response during invasive *Candida albicans* infection. *Nat Commun* 2019; **10**:  
965 1015.
- 966 115 Roemer T, Delaney S, Bussey H. SKN1 and KRE6 define a pair of functional homologs  
967 encoding putative membrane proteins involved in beta-glucan synthesis. *Mol Cell Biol*  
968 1993; **13**: 4039–4048.
- 969 116 Wang C, Li M, Li G *et al.* Two distinct nucleic acid binding surfaces of Cdc5 regulate  
970 development. *Biochem J* 2019; **476**: 3355–3368.
- 971 117 Veloso MM, Almandanim MC, Baleiras-Couto M *et al.* Microsatellite database of grapevine  
972 (*Vitis vinifera* L.) cultivars used for wine production in Portugal. *Ciência Téc Vitiv* 2010; **25**:  
973 53–61.
- 974 118 Almagro Armenteros JJ, Salvatore M, Emanuelsson O *et al.* Detecting sequence signals in  
975 targeting peptides using deep learning. *Life Sci Alliance* 2019; **2**: e201900429.
- 976 119 Sperschneider J, Dodds P. EffectorP 3.0: prediction of apoplastic and cytoplasmic effectors  
977 in fungi and oomycetes. *MPMI* 2021. doi:10.1094/MPMI-08-21-0201-R.
- 978 120 Pang Z, Chong J, Zhou G *et al.* MetaboAnalyst 5.0: narrowing the gap between raw spectra  
979 and functional insights. *Nucleic Acids Research* 2021; **49**: W388–W396.
- 980 121 Breitling R, Armengaud P, Amtmann A, Herzyk P. Rank products: a simple, yet powerful,  
981 new method to detect differentially regulated genes in replicated microarray experiments.  
982 *FEBS Lett* 2004; **573**: 83–92.
- 983 122 Bendtsen JD, Jensen LJ, Blom N, Von Heijne G, Brunak S. Feature-based prediction of non-  
984 classical and leaderless protein secretion. *Protein Eng Des Sel* 2004; **17**: 349–356.
- 985 123 Armenteros JJA, Tsirigos KD, Sønderby CK *et al.* SignalP 5.0 improves signal peptide  
986 predictions using deep neural networks. *Nature Biotechnology* 2019; **37**: 420.
- 987 124 Emanuelsson O, Brunak S, Heijne G von, Nielsen H. Locating proteins in the cell using  
988 TargetP, SignalP and related tools. *Nature Protocols* 2007; **2**: 953.
- 989 125 Sperschneider J, Dodds PN, Singh KB, Taylor JM. ApoplastP: prediction of effectors and  
990 plant proteins in the apoplast using machine learning. *New Phytologist* 2018; **217**: 1764–  
991 1778.
- 992 126 Savojardo C, Martelli PL, Fariselli P, Profiti G, Casadio R. BUSCA: an integrative web server  
993 to predict subcellular localization of proteins. *Nucleic Acids Res* 2018; **46**: W459–W466.

- 994 127 Petsalaki EI, Bagos PG, Litou ZI, Hamodrakas SJ. PredSL: a tool for the N-terminal sequence-  
995 based prediction of protein subcellular localization. *Genomics, Proteomics &*  
996 *Bioinformatics* 2006; **4**: 48–55.
- 997 128 Lohse M, Nagel A, Herter T *et al.* Mercator: a fast and simple web server for genome scale  
998 functional annotation of plant sequence data. *Plant Cell Environ* 2014; **37**: 1250–1258.
- 999 129 Conesa A, Götz S, García-Gómez JM, Terol J, Talón M, Robles M. Blast2GO: a universal tool  
1000 for annotation, visualization and analysis in functional genomics research. *Bioinformatics*  
1001 2005; **21**: 3674–3676.
- 1002
- 1003
